# Supplementary material for: The European lactase persistence genotype determines the lactase persistence state and correlates with gastrointestinal symptoms in the Hispanic and Amerindian Chilean population: a case–control and population-based study
Source: PubMed Central journal article supplement — BMJ Open. 2011 Jul 29;1(1):e000125. doi: 10.1136/bmjopen-2011-000125 (PMC3191413; doi:10.1136/bmjopen-2011-000125), 2011-07-29
Supplement: bmjopen-2011-000125.draft_revisions.pdf [file bmjopen-2011-000125.draft_revisions.pdf]

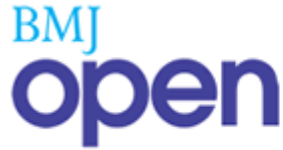

**The European lactase persistence genotype determines lactase persistence in the Hispanic and Amerindian Chilean population: relevance for prevalence of adult type hypolactasia and lactose intolerance in Latin American populations.**

|                               |                                                                                                                                                                                                                                                                                                                                                                                                                                                                                                                                                                                                                                                 |
|-------------------------------|-------------------------------------------------------------------------------------------------------------------------------------------------------------------------------------------------------------------------------------------------------------------------------------------------------------------------------------------------------------------------------------------------------------------------------------------------------------------------------------------------------------------------------------------------------------------------------------------------------------------------------------------------|
| Journal:                      | <i>BMJ Open</i>                                                                                                                                                                                                                                                                                                                                                                                                                                                                                                                                                                                                                                 |
| Manuscript ID:                | bmjopen-2011-000125                                                                                                                                                                                                                                                                                                                                                                                                                                                                                                                                                                                                                             |
| Article Type:                 | Research                                                                                                                                                                                                                                                                                                                                                                                                                                                                                                                                                                                                                                        |
| Date Submitted by the Author: | 02-Apr-2011                                                                                                                                                                                                                                                                                                                                                                                                                                                                                                                                                                                                                                     |
| Complete List of Authors:     | Morales, Eugenia; Pontificia Universidad Catolica de Chile, Gastroenterology<br>Azocar, Lorena; Pontificia Universidad Catolica de Chile, Gastroenterology<br>Maul, Ximena; Pontificia Universidad Catolica de Chile, Medical student<br>Perez, Claudio; Pontificia Universidad Catolica de Chile, Medical student<br>Klassen, Julieta; Pontificia Universidad Catolica de Chile, Nutrition and Diabetes<br>Nervi, Flavio; Pontificia Universidad Catolica de Chile, Gastroenterology<br>Chianale, Jose; Pontificia Universidad Catolica de Chile, Gastroenterology<br>Miquel, Juan; Pontificia Universidad Catolica de Chile, Gastroenterology |
| <b>Subject Heading</b>:       | Gastroenterology                                                                                                                                                                                                                                                                                                                                                                                                                                                                                                                                                                                                                                |
| Keywords:                     | lactose intolerance, lactase persistence state, -13910T variant, IBS                                                                                                                                                                                                                                                                                                                                                                                                                                                                                                                                                                            |
|                               |                                                                                                                                                                                                                                                                                                                                                                                                                                                                                                                                                                                                                                                 |

SCHOLARONE™  
Manuscripts

1  
2  
3 **The European lactase persistence genotype determines lactase persistence in the**  
4 **Hispanic and Amerindian Chilean population: relevance for prevalence of adult**  
5 **type hypolactasia and lactose intolerance in Latin American populations.**  
6  
7  
8  
9

10  
11  
12  
13 Eugenia Morales<sup>1</sup>, Lorena Azocar<sup>1</sup>, Ximena Maul<sup>2</sup>, Claudio Perez<sup>2</sup>, Julieta Klassen<sup>3</sup>,  
14  
15 Flavio Nervi<sup>1</sup>, José Chianale<sup>1</sup>, Juan Francisco Miquel<sup>1\*</sup>.  
16  
17

18  
19 Department of Gastroenterology<sup>1</sup>, Medical Students<sup>2</sup>, and Department of  
20  
21 Nutrition&Diabetes<sup>3</sup>, Faculty of Medicine, Pontificia Universidad Católica de Chile.  
22  
23

24  
25 **Keywords:** lactose intolerance, lactase persistence state, -13910T variant, IBS.  
26  
27

28  
29  
30  
31  
32 **\*Correspondence:**  
33

34  
35 Juan Francisco Miquel, MD  
36

37  
38 Marcoleta 367, Santiago  
39

40  
41 Telephone: 56 2 3543830  
42

43  
44 Fax: 56 2 6397780  
45

46  
47 e-mail: jfmiquel@med.puc.cl  
48  
49  
50

51  
52  
53 **Word count: 3,538**  
54  
55  
56  
57  
58  
59  
60

## Abstract

**Background:** The lactase persistent (LP) or lactase non persistent (LNP) state in European adults is genetically determined by a single nucleotide polymorphism (SNP) located 13.9 kb upstream of the lactase (LCT) gene, known as LCT C>T<sub>-13910</sub> (rs4988235). The LNP condition causes an inability to digest the milk sugar lactose leading to gastrointestinal symptoms and can affect nutrient and calcium intake in certain populations. **Objectives:** We studied a group of 51 Chilean patients to assess whether this SNP influences the LP/LNP state in this population, and determined the prevalence of LCT C>T<sub>-13910</sub> genotypes in a representative sample of 216 Hispanics and 43 Amerindians with correlation to digestive symptoms. **Design:** Case-Control study done in Chilean patients with clinical suspicion of LNP that were assessed using clinical survey, hydrogen breath test (HBT), and SNP genotyping. The population sample of Hispanics and Amerindians was assessed by clinical survey and SNP genotyping. **Results:** Of the 51 patients with clinical suspicion of LNP, 29 were HBT positive. The CC genotype (LNP) was present in 89.7% of the patients with positive HBT and in only 4.7% of those with negative HBT. The prevalence of the CC genotype was 56.9% in the Hispanic population and 88.3% in Amerindians and was associated with a higher self reported clinical intolerance to dairies ingestion. **Conclusion:** The LP/LNP state is determined by the LCT C>T<sub>-13910</sub> SNP in Chileans. This variant predicts digestive symptoms associated with the ingestion of lactose and is a good tool for the diagnosis of primary adult hypolactasia. The LCT T<sub>-13910</sub> allele is rare in the Amerindian population and is suggestive of European ancestry in this contemporary population.

## ARTICLE SUMMARY

**Article focus:** The aims of the present study were three questions; 1) If the European variant C/T-13910 determined lactose-persistent and lactose non-persistent state in adult Chilean Hispanic and Amerindian population; 2) If there is a correlation between the C/T-13910 genotyping and the hydrogen breath test (HBT) for diagnosis of LNP in our population; 3) To determine for the first time in an Latin American population the prevalence of the lactose non-persistence genotype (CC) and its correlation with digestive symptoms and ingestion of dairy products.

**Significance of the study:** The three key messages of the present study were: 1) We demonstrate for the first time that the European lactase persistence -13910T variant determines lactase persistence in the Chilean Hispanic and Amerindian population. 2) We demonstrate a strong correlation between the C-13910>T genotype with the hydrogen breath test and lactose tolerance in a group of patients with clinical suspicion of lactose intolerance. 3) In a representative sample of the Hispanic Chilean population (Mestizos) and in Amerindians, we observed a high prevalence of the lactose non-persistence genotype (CC) with a clear gradient between ethnic groups (56% and 88%, respectively). Interestingly, C-13910>T genotype was significantly associated with digestive symptoms and self reporting intolerance to dairy ingestion. This could explain the observed low consumption of dairy products (30 L milk/person/year) in our population.

### Strengths and limitations of the study:

- Our strengths:

- This is the first study in Latin America that assesses if the European lactase persistence -13910T variant determines lactase persistence in the Chilean Hispanic and Amerindian general population.
- Our results may be of clinical and epidemiological relevance, not only for the Chilean population, but also for other Hispanic and Amerindian populations of the Americas with similar genetic background. The fact that the LNP state is an inherited frequent condition in Mestizo and Amerindians should be considered when developing public programs that encourage consumption of dairy products, and should be a stimulus for the food industry to develop new and high quality lactose-free dairy products in these regions.
- We randomly selected a representative sample of the Hispanic Chilean population and Amerindians (n=216), and performed the genotyping of LCT C>T <sub>-13910</sub>. We observed a high prevalence of the lactose non-persistence genotype (CC) with a clear gradient between both ethnic groups (56% and 88%, respectively), that correlates with digestive symptoms and self reporting intolerance to dairy ingestion.

- **Our limitations:**

- Not randomized recruitment of the 51 patients with suspicion of lactose intolerance could induce selection bias.
- A small number of patients with suspicion of lactose intolerance (n= 51).

- Semi-quantitative food frequency questionnaire with a 24 h dietary recall obtained in a subgroup of the Hispanics and performed years before the genetic analysis.

For peer review only

1  
2  
3  
4  
5  
6  
7  
8  
9  
10  
11  
12  
13  
14  
15  
16  
17  
18  
19  
20  
21  
22  
23  
24  
25  
26  
27  
28  
29  
30  
31  
32  
33  
34  
35  
36  
37  
38  
39  
40  
41  
42  
43  
44  
45  
46  
47  
48  
49  
50  
51  
52  
53  
54  
55  
56  
57  
58  
59  
60

## INTRODUCTION

Lactose, the main sugar in milk, must be hydrolyzed by lactase-phlorizin hydrolase into glucose and galactose for absorption. Intestinal activity of the lactase enzyme (LCT) (MIM 603202) decreases in all mammals after weaning, resulting in poor lactose absorption (1). In humans this condition is termed “lactase non-persistence” (LNP), “adult type hypolactasia”, or “lactose intolerance” (MIM 223100) and is estimated to occur in approximately 65% of the contemporary world population (2, 3). LNP can generate intolerance to the ingestion of dairies with the development of abdominal and systemic symptoms that lead to medical consultations and evaluations. In contrast, lactase persistent (LP) individuals remain tolerant of lactose and maintain high levels of LCT expression throughout adult life (4). The prevalence of the LP phenotype, which is an autosomal dominant condition (MIM 223100) is reported to vary between 0 and 95% in different populations (3), but is unknown in contemporary Latin American populations (2, 5).

The recent discovery of single nucleotide polymorphisms (SNPs) that determine the LP state in humans, both in Europe (6) and among some pastoral populations in Africa, has generated growing interest in the study of this condition (2, 7). The appearance of these SNPs seems to have occurred on more than one occasion in human evolution between 1,500 and 12,000 y ago in northern Europe and among some nomadic populations of Asia and Africa (7). The SNP known as LCT C>T<sub>-13910</sub> (rs4988235) is located 13.9 kb upstream of the LCT gene in the 13<sup>th</sup> intron of an adjacent gene (MCM6). The T allele of this SNP correlates with the LP state in European populations (6), and individuals with this allele have higher levels of LCT transcripts in enterocytes compared to individuals who carry the C allele (8). *In vitro* studies show that cells transfected with the LCT T<sub>-13910</sub> variant show increased activity

1  
2  
3 of the LCT promoter (9). Another SNP known as LCT G>A<sub>22018</sub>, shows some  
4  
5 association with the LP/LNP phenotype, and while it does not appear to be the causal  
6  
7 variant, it is present in a block of linkage disequilibrium with little evidence of  
8  
9 recombination in this region of the genome (5, 10).  
10  
11

12  
13 In clinical practice, the LNP state is relevant because it can generate  
14  
15 malabsorption and intolerance of lactose, with the development of clinical symptoms  
16  
17 such as abdominal pain and distension, diarrhea, bloating, nausea, and vomiting (3). A  
18  
19 significant percentage of patients do not relate these symptoms to dairies ingestion (11),  
20  
21 and the recurring nature of the symptoms can lead to misdiagnosis of chronic diarrhea,  
22  
23 irritable bowel syndrome, celiac illness, or other clinical conditions (12-16). The  
24  
25 diagnosis of LNP is often based on clinical suspicion and the favorable response to a  
26  
27 lactose restricted diet.  
28  
29  
30

31  
32 The most widely used diagnostic test of poor lactose absorption is the hydrogen  
33  
34 breath test (HBT) (11, 17). Nevertheless, this test has practical limits and its sensitivity  
35  
36 and specificity varies between 69 - 100% and 89 - 100%, respectively, compared to  
37  
38 measurement of LCT activity in intestinal biopsies. Additionally, there is a false  
39  
40 negative rate of 11 - 30%, and a false positive rate of up to 57% using this test (18-21).  
41  
42 Using SNP genotyping in patients with suspected LNP may therefore aid in proper  
43  
44 diagnosis (10, 18, 22-26). The only epidemiological study of adult hypolactasia in a  
45  
46 Chilean population was performed more than three decades ago (27) and suggested that  
47  
48 the prevalence of LNP was 56% and 75% for the pediatric and adult populations,  
49  
50 respectively. Our objectives were to determine the influence of the LCT C>T<sub>13910</sub> SNP  
51  
52 on the LP/LNP state in the Chilean population and to determine the population  
53  
54 prevalence of the SNP genotypes in a representative Hispanic and Amerindian  
55  
56  
57  
58  
59  
60



1  
2  
3 population with comparison of the genotypes to clinical symptoms related to dairies  
4  
5  
6 ingestion.  
7  
8  
9  
10  
11  
12  
13  
14  
15  
16  
17  
18  
19  
20  
21  
22  
23  
24  
25  
26  
27  
28  
29  
30  
31  
32  
33  
34  
35  
36  
37  
38  
39  
40  
41  
42  
43  
44  
45  
46  
47  
48  
49  
50  
51  
52  
53  
54  
55  
56  
57  
58  
59  
60

For peer review only

## **SUBJECTS AND METHODS**

### **Patients with clinical suspicion of lactase non persistence (LNP).**

In 2006, 51 patients were enrolled in a prospective study after being referred to the Gastroenterological Department of the Clinical Hospital at the Pontificia Universidad Catolica de Chile because of symptoms suggestive of LNP. A pre-coded survey was obtained from all patients to obtain demographic, anthropometric, familial, and clinical data, including any symptoms experienced during the diagnostic hydrogen breath test (HBT) such as abdominal pain, diarrhea, bloating, nausea, and vomiting. A 5 ml EDTA blood sample was obtained to extract DNA. Serum levels of immunoglobulin A and tissue anti-transglutaminase antibodies (hu tTG ELISA, IMMCO Diagnostics, Inc., Buffalo, NY) were quantified in all the patients to rule out the existence of celiac disease. This study was approved by the Ethics Committee of the Faculty of Medicine, PUC, and all patients signed a written informed consent form prior to the study.

### **Hydrogen breath test (HBT) for diagnosis of LNP.**

Patients were instructed to maintain a low fiber diet without lactose for 48 h prior to the day of the examination. After 12 h of fasting, a baseline concentration of H<sub>2</sub> in exhaled breath was determined using a Quintron® microLyzer (QuinTron Instrument Company, Milwaukee, WI). Subjects then ingested 25 g lactose and H<sub>2</sub> concentration in breath was quantified every 20 m for a maximum of 4 h. Individuals were considered LNP with an increase in H<sub>2</sub> concentration 20 ppm above the base value (17, 28).

### **Population study.**

A representative sample of 216 unrelated Hispanics and 43 unrelated Amerindians were randomly selected from an initial sample of 1581 Hispanics and 120 Amerindians (Mapuches, the Chilean native population) which were collected between 1993 and

2000 as described previously (29, 30). The sample size was selected by estimating an expected prevalence of the LCT-13910CC genotype to be at least 50% in the Hispanic population and 80% in the Amerindians, with an alpha error of 5% and a level of confidence of 80%. All study subjects provided a DNA sample and a medical survey that provided anthropometric and clinical data including information about diarrhea, abdominal pain, or bloating in response to ingestion of dairy products (29, 30). Furthermore, a subgroup of the Hispanic subjects provided a semi-quantitative food frequency questionnaire with a 24 h dietary recall. From this data, specific energy and nutrient ingestion from dairy products was estimated using the Datadiet program (29, 31). For all subjects, the occurrences of digestive symptoms in response to consumption of lactose were correlated to SNP genotyping results.

#### **Genotyping of LCT C>T<sub>-13910</sub> and LCT G>A<sub>-22018</sub> SNPs**

SNP genotyping was performed using PCR-RFLP methods (32) (GenBank reference sequence NM\_005915.4). Briefly, genomic DNA was extracted from 300 µl of blood according to manufacturer's instructions (Wizard SV Genomic DNA Purification System, Promega, Madison, WI) and the regions surrounding the SNPs were amplified through PCR using primers (F) 5'-GGA TGC ACT GCT GTG ATG AG-3' and (R) 5'-CCC ACT GAC CTA TCC TCG TG-3' for the LCT C>T<sub>-13910</sub> and (F) 5'-AAC AGG CAC GTG GAG GAG TT-3' and (R) 5'-CCC ACC TCA GCC TCT TGA GT-3' for LCT G>A<sub>-22018</sub>. In both cases, the amplified products were of 448 bp. The PCR reactions and RFLP assays for the analysis of both genetic variants was carried out as described previously (32). Briefly, the amplified product for the LCT C>T<sub>-13910</sub> SNP was digested with *BsmFI*, generating two fragments of 351 and 97 bp in the presence of the CC genotype, and 3 fragments of 253, 98, and 97 bp in the presence of the TT genotype (**Figure 1**). For the LCT G>A<sub>-22018</sub> SNP, the PCR product was digested with

1  
2  
3 *HhaI*, generating two fragments of 284 and 184 bp in the presence of the GG genotype  
4 and one undigested fragment of 448 bp in the presence of the A/A genotype. The  
5 amplified and digested PCR products were separated by electrophoresis on 2% agar gels  
6 in 1X TAE buffer stained with ethidium bromide. Genotyping confirmation was carried  
7 out on 35 samples by direct sequencing of the 448 bp amplified fragments (models  
8 ABI-310 and ABI-3100 automated DNA sequencers, Applied Biosystems, Foster City,  
9 CA) (**Figure 1**). There was complete concordance between the PCR-RFLP analysis and  
10 the sequencing in all cases.  
11  
12  
13  
14  
15  
16  
17  
18  
19  
20  
21  
22

### 23 **Statistical analysis**

24  
25 Mean and standard deviations were used to describe numeric variables. The variables of  
26 categorical types are given as a number and a percentage. Comparisons of continuous  
27 variables were performed using the student T test for independent samples.  
28 Comparisons of categorical variables were carried out using the chi-square test. Using  
29 the HBT breath test as diagnostic for LNP, an analysis was made of the sensitivity and  
30 specificity of the genetic test as an alternative diagnostic test. Differences were  
31 considered significant when  $p < 0.05$ .  
32  
33  
34  
35  
36  
37  
38  
39  
40  
41  
42  
43  
44  
45  
46  
47  
48  
49  
50  
51  
52  
53  
54  
55  
56  
57  
58  
59  
60

## RESULTS

### **Hydrogen breath test and SNP genotyping**

Fifty-one patients with clinical suspicion of LNP (44 women and 7 men, age 14 - 79 y) were included in the study. Twenty-nine patients (56.8%) had a positive HBT and 22 were negative (43.2%) (**Table 1**). There were no significant differences in the distribution by sex and age between the two groups. There was a positive correlation between the HBT results and digestive symptoms reported during the test: 82% of the patients with positive HBT had symptoms associated with the lactose load, such as bloating, abdominal pain, and diarrhea (79%, 58% and 20%, respectively). In contrast, only 27% of the patients with negative HBT presented symptoms after ingesting lactose ( $p < 0.0001$ ). Additionally, 76% of patients with positive HBT indicated a personal and/or family history of functional digestive disorders, compared to 36% of those with negative HBT ( $p < 0.0001$ ).

The LCTC>T<sub>-13910</sub> SNP genotyping results for the 51 patients is shown in Table 1. Of the 29 patients with positive HBT, 26 (89.7%) had the LCT-13910CC genotype (the LNP genotype), and 3 (10.3%) had the LCT-13910CT genotype and were therefore phenotypically LNP but genotypically LP. However, two of these 3 patients experienced bloating and diarrhea during the HBT, which suggests malabsorption of lactose. Of the 22 patients who had a negative HBT, 19 were LCT-13910CT, two were LCT-13910TT, and a single 16-year-old patient had the LNP LCT-13910CC genotype (Table 1). However, this patient experienced abdominal pain during the HBT. Subsequent evaluation of this patient with a lactulose HBT (10 g load) revealed that this patient was not a non-producer of hydrogen. A single patient with LNP genotype and positive HBT had high levels of anti-tTG (27  $\mu$ U/ml), which suggests the possibility of

1  
2  
3 coexistence of LNP and celiac disease. All the patients showed normal levels of serum  
4  
5 IgA (data not shown).  
6

7  
8 There was complete genotypic correlation between the LCTC>T<sub>-13910</sub> and the LCTG>A.  
9  
10 <sub>22018</sub> SNPs, such that any subject homozygous or heterozygous for one SNP was at the  
11  
12 same time homozygous or heterozygous for the other SNP (data not shown).  
13  
14 Furthermore, there was good correlation between the LCTC>T<sub>-13910</sub> SNP findings and  
15  
16 the HBT test results (**Table 2**). Genotyping results were confirmed by sequencing for 35  
17  
18 of the 51 samples (**Figure 2**). Interestingly, one of the three discordant patients with  
19  
20 LNP phenotype but LP genotype was also heterozygous at a second location not  
21  
22 previously described in the literature, LCTG>A<sub>-13937</sub>.  
23  
24  
25  
26  
27

### 28 **Population study**

29  
30 We collected DNA samples and medical surveys from 216 unrelated Hispanic  
31  
32 individuals and 43 unrelated Amerindians. The survey information is summarized in  
33  
34 **Table 3**. The two groups were similar in age, with higher representation of females  
35  
36 among the Amerindians. The Amerindian cohort reported a higher frequency of  
37  
38 intolerance to ingesting dairy products and recurring diarrhea while both groups  
39  
40 reported recurring abdominal bloating with equal frequency.  
41  
42  
43

44  
45 The genotype and allele frequencies for the LCTC>T<sub>-13910</sub> SNP are shown in **Table 3**.  
46  
47 As was found in the study group of 51 Chilean patients with suspected lactose  
48  
49 intolerance, there was complete concordance between the genotypes of the LCTC>T.  
50  
51 <sub>13910</sub> and LCTG>A<sub>-22018</sub> SNPs in each individual (data not shown). The cohort of  
52  
53 Amerindian individuals was in Hardy-Weinberg equilibrium (**Figure 2**), but we  
54  
55 observed a slightly higher than expected frequency of the T<sub>-13910</sub> allele in the Hispanic  
56  
57 population (deviation from HW equilibrium  $p < 0.05$ ). The prevalence of the ancestral  
58  
59 LCT-13910CC genotype (the LNP genotype) was 56.9%, significantly lower than the  
60

1  
2  
3 prevalence of this genotype among the Amerindian individuals (88.3%). In turn, 41.7%  
4  
5 of the Hispanics were LCT-13910CT genotype compared to only 11.7% of the  
6  
7 Amerindians. The LCT-13910TT genotype was found in only 3 Hispanic subjects.  
8  
9 Allele frequencies for the LCTC>T<sub>-13910</sub> SNP were significantly different between the  
10  
11 two groups, with the T<sub>-13910</sub> allele being very infrequent in Amerindians.  
12  
13

14  
15 For the 216 Hispanic individuals studied, we were able to gather clinical and genetic  
16  
17 data (**Table 3**). Individuals with the LNP LCT-13910CC genotype were 3 times more  
18  
19 likely to report intolerance to the ingestion of dairy products and recurring diarrhea than  
20  
21 those with LP genotypes (LCT-13910CT or LCT-13910TT). For 112 of these  
22  
23 individuals, we collected complete nutritional information. The consumption of dairy  
24  
25 products was in general very low, equivalent to an average of 30 L of fresh milk per  
26  
27 year per person. However, the group of individuals with an LP genotype had 38%  
28  
29 higher consumption of dairy products than the group of individuals with the LNP  
30  
31 genotype (38.4 L ± 67 L versus 27.7 L ± 40 L milk/year, respectively), although this  
32  
33 difference was not statistically significant.  
34  
35  
36  
37  
38  
39  
40  
41  
42  
43  
44  
45  
46  
47  
48  
49  
50  
51  
52  
53  
54  
55  
56  
57  
58  
59  
60

## DISCUSSION

The normal physiologic decrease in lactase (LCT) production in the mammalian intestine following weaning is known as lactase non persistence (LNP), and results in the inability to digest the milk sugar, lactose, which can cause gastrointestinal symptoms after ingestion of dairies. The condition of lactase persistence (LP), found only in humans, allows the individual to continue to ingest and absorb lactose into adulthood. In European populations and some Afro-Arab pastoral groups, the LP condition has been shown to be due to a SNP (rs4988235) found 13.9 kb upstream of the LCT gene and actually located within the 13<sup>th</sup> intron of the MCM6 gene. This SNP, known in the literature by many names but herein called LCTC>T<sub>-13910</sub>, appeared relatively recently in human history (approximately 10,000 y ago) and has spread progressively throughout the world through population migration and mixing, increasing the state of LP in different populations given its autosomal dominant property (2). The original populations of the Americas and Asia were likely LNP. There is no evidence of the existence of American variants that might have generated the LP state in the pre-Columbian era (2, 5). The T<sub>-13910</sub> allele, which leads to the LP state, was likely introduced to the Americas by the migration of European carriers of this variant approximately 500 years ago and spread rapidly in the Hispanic populations of contemporary America, as is shown in this study as well as others (5, 33).

Our study of a representative population of Chile consisting of Hispanic and Amerindian individuals showed the prevalence of the LNP state (LCT-13910CC genotype) to be 57% and 88%, respectively. It is interesting to note that this observed genotypic frequency is very similar to the Amerindian admixture index (AAI) estimated by us in these same populations based on the distribution of ABO blood groups (29).



1  
2  
3 This suggests that the analysis of the LCTC>T<sub>-13910</sub> SNP in Latin American populations  
4  
5 can be a good indicator of the degree Amerindian or Caucasian inheritance.  
6  
7

8 In all Chilean patients genotyped in this study, the LCTG>A<sub>-22018</sub> SNP genotype  
9  
10 correlated completely with the genotype found for the LCTC>T<sub>-13910</sub> SNP, a finding  
11  
12 reported in many studies. This phenomenon can be explained by the fact that both SNPs  
13  
14 are located within a highly conserved block of linkage disequilibrium of at least 500 kb  
15  
16 and likely co-segregate (2, 5).  
17  
18

19 In the group of 216 unrelated Hispanic individuals, we observed a higher than expected  
20  
21 frequency of the T<sub>-13910</sub> allele, which leads to the LP state. While this could be explained  
22  
23 by selection bias or by a higher frequency of LP in the Spanish population that founded  
24  
25 the Chilean colony, it could also be reflective of positive selection for LP allele carriers,  
26  
27 as has been suggested for decades (34-36). Any evolutionary advantage conferred by  
28  
29 the T<sub>-13910</sub> allele may or may not be related to the consumption of dairy products.  
30  
31 Indeed, it was recently reported that this allele confers protection not only against bone  
32  
33 fractures (37, 38), but also colon cancer (39).  
34  
35  
36  
37

38 The validity of using LCTC>T<sub>-13910</sub> SNP genotyping for diagnosis of the LNP or LP  
39  
40 state was evaluated in the group of 51 Chilean patients with suspected LNP. Using HBT  
41  
42 results as a reference, SNP genotyping showed a specificity of 95.5% and a sensitivity  
43  
44 of 93% for the detection of LNP. These results are similar to those recently reported by  
45  
46 other groups (10, 25, 32), and confirm the utility of the analysis of this SNP as a clinical  
47  
48 test for the diagnosis of LP/LNP in the adult Chilean population. Only 3 patients  
49  
50 (10.3%) with malabsorption of lactose shown by HBT, were genetically LP (LCT-  
51  
52 13910CT genotype). It was not possible to recall these 3 patients to carry out  
53  
54 complementary studies to rule out other causes of lactose malabsorption, such as  
55  
56 intestinal parasitic infections like Giardiasis or seronegative celiac disease.  
57  
58  
59  
60

1  
2  
3 Interestingly, one of these patients was also heterozygous at an additional SNP not  
4 previously described, LCTG>A<sub>-13937</sub> (2). We do not know if this new variant can  
5 explain the phenotype-genotype discordance.  
6  
7

8  
9  
10 A recent study showed a high prevalence of celiac illness among patients with an initial  
11 diagnosis of LNP, suggesting that lactose intolerance can be the first manifestation of  
12 celiac illness; the authors recommend considering the existence of celiac illness in all  
13 patients with LNP before recommending a lactose free diet for life (40). In our study of  
14 51 patients with clinical suspicion of lactose intolerance, only one with LNP confirmed  
15 by HBP and SNP genotyping had positive anti-tTG (2% of the total) suggesting the  
16 coexistence of both conditions.  
17  
18

19  
20 One 16-year-old patient had negative HBT yet had the LNP genotype. It is possible that  
21 this patient has not yet manifested the LNP phenotype and still maintains sufficient  
22 levels of intestinal lactase to digest a 25 g load. The age at which the LNP state is  
23 initiated varies among different populations and ethnic groups, starting as early as 1 to 8  
24 y in black and Asian populations, and much later (20 y) in northern European  
25 populations (10, 41-43). The age of initiation of the LNP state in Chilean individuals  
26 remains unknown.  
27  
28

29  
30 Among the 51 Chilean patients with positive HBT and the LCT-13910CC genotype,  
31 significantly more report having relatives with functional digestive disorders than their  
32 HBT negative counterparts, suggesting that the condition of LNP could be in part  
33 responsible for digestive symptoms. In our complete clinical, nutritional, and genetic  
34 study of 112 Hispanic individuals, those with the LCT-13910CC genotype were  
35 significantly more likely to self-report lactose intolerance despite very low (30 L  
36 milk/person/year) consumption of dairy products. This level is well below the WHO  
37 recommended level of 240 L milk/person/year. Reasons for the low level of  
38  
39  
40  
41  
42  
43  
44  
45  
46  
47  
48  
49  
50  
51  
52  
53  
54  
55  
56  
57  
58  
59  
60

1  
2  
3 consumption are likely due to multiple causes including cost, preference, and societal  
4 habits which are likely influenced by the existence of a high prevalence of LNP state  
5 within this population. It has been reported that the allele frequencies of the LCTC>T.  
6  
7  
8  
9  
10  
11  
12  
13  
14  
15  
16  
17  
18  
19  
20  
21  
22  
23  
24  
25  
26  
27  
28  
29  
30  
31  
32  
33  
34  
35  
36  
37  
38  
39  
40  
41  
42  
43  
44  
45  
46  
47  
48  
49  
50  
51  
52  
53  
54  
55  
56  
57  
58  
59  
60

13910 SNP within a population correlates with the tendency of that population to consume dairy products and ingest calcium (44-46). Both this study and one other (47) show that the effective consumption of dairy products and calcium in Chile remains below international recommendations.

In summary, the LNP state continues to be predominant in the Chilean population. Epidemiologically, this may cause the development of digestive symptoms affecting quality of life and leading to medical consultations as well as lower tendency to ingest dairy products and calcium within the adult population of the contemporary Americas. The fact that the LNP state is an inherited condition should be considered when developing public programs that encourage consumption of dairy products, and should be a stimulus for the food industry to develop new lactose-free dairy products.

**Table 1. Clinical and genetic characteristics of 51 Chilean patients having hydrogen breath test (HBT) for suspicion of lactose non persistence (LNP).**

|                                                               | <b>HBT Positive</b><br><b>(n = 29)</b> | <b>HBT Negative</b><br><b>(n = 22)</b> | <b><i>p</i></b> |
|---------------------------------------------------------------|----------------------------------------|----------------------------------------|-----------------|
| Female gender (%)                                             | 82.7                                   | 86.3                                   | n.s.            |
| Age (y)                                                       | 36 ± 19                                | 32 ± 12                                | n.s.            |
| Number reporting gastrointestinal symptoms after lactose load | 24 (82%)                               | 6 (27%)                                | < 0.001         |
| Number reporting family history of IBS                        | 22 (76%)                               | 8 (36%)                                | < 0.001         |
| LCT-13910 CC genotype                                         | 26 (89.6%)                             | 1 (4.5%)                               | < 0.001         |
| LCT-13910 CT/TT genotype                                      | 3 (10.3%)                              | 21(95.5%)                              | < 0.001         |

IBS, irritable bowel syndrome.

**Table 2. Correlation of the LCT-13910CC genotype with positive HBT result in 51 Chilean patients, demonstrating sensitivity and specificity of genotyping for diagnosis of LNP.**

|                           |       |
|---------------------------|-------|
| Sensitivity               | 92.8% |
| Specificity               | 95.4% |
| Predictive value positive | 96.2% |
| Predictive value negative | 91.3% |
| LHR                       | 20.4  |

LHR, likelihood ratio

**Table 3. General characteristics, self reported gastrointestinal symptoms related to dairy ingestion and LCTC>T<sub>-13910</sub> SNP genotype and allele frequencies in a population of Hispanic and Amerindian individuals.**

|                                           | <b>Hispanics</b><br>n = 216 | <b>Amerindians</b><br>n = 43 | <i>P</i> |
|-------------------------------------------|-----------------------------|------------------------------|----------|
| Women (%)                                 | 46                          | 65                           | 0.02     |
| Age (y)                                   | 50 ± 12                     | 54 ± 15                      | n.s.     |
| Number self reporting lactose intolerance | 44 (20.4%)                  | 19 (44.1%)                   | 0.001    |
| Number reporting bloating                 | 77 (35.6%)                  | 14 (32.5%)                   | n.s.     |
| Number reporting diarrhea                 | 15 (7%)                     | 16 (37.2%)                   | 0.06     |
| LCT-13910 CC genotype                     | 123 (56.9%)                 | 38 (88.3%)                   | < 0.001  |
| LCT-13910 CT genotype                     | 90 (41.7%)                  | 5 (11.7%)                    | < 0.001  |
| LCT-13910 TT genotype                     | 3 (1.4%)                    | 0                            | n.s.     |
| C allele frequency                        | 77.7%                       | 94.2%                        | < 0.001  |
| T allele frequency                        | 22.3%                       | 5.8%                         | < 0.001  |

n.s., not significant

1  
2  
3 **Author's contribution:** Study concept and design (JFM); acquisition of data (JFM,  
4 EM, LA, JK, XM and CP); analysis and interpretation of data (JFM, EM, JCh); drafting  
5 of the manuscript (JFM, EM); critical revision of the manuscript for important  
6 intellectual content (JCh, FN); statistical analysis (JFM, EM); obtained funding (JFM,  
7 FN); final revision and edition (JFM, CP, XM).

8  
9  
10  
11  
12  
13  
14  
15  
16 **Acknowledgments:** The authors acknowledge the Alexander von Humboldt  
17 Foundation (Germany) for donating the NanoDrop ND-1000 Spectrophotometer used  
18 for DNA analysis and quantification. This study was partially supported grants of the  
19 National Commission of Scientific and Technological Research (CONICYT),  
20 FONDECYT N°1080325 to JFM, and from the Office of Research affairs of the  
21 Pontificia Universidad Catolica de Chile, School of Medicine to EM.  
22  
23  
24  
25  
26  
27  
28  
29  
30  
31  
32  
33

34 **Competing Interest:** We declare no conflicts of interest.  
35  
36  
37  
38

39 **License for Publication:**

40  
41 The Corresponding Author has the right to grant on behalf of all authors and does grant  
42 on behalf of all authors, an exclusive license (or non exclusive for government  
43 employees) on a worldwide basis to the BMJ Publishing Group Ltd and its Licensees to  
44 permit this article (if accepted) to be published in BMJ Open editions and any other  
45 BMJ PGL products to exploit all subsidiary rights, as set out in our license.  
46  
47  
48  
49  
50  
51  
52  
53  
54  
55  
56  
57  
58  
59  
60

## REFERENCES

1. Enattah N, Pekkarinen T, Valimaki MJ, Loyttyneimi E, Jarvela I. Genetically defined adult-type hypolactasia and self-reported lactose intolerance as risk factors of osteoporosis in Finnish postmenopausal women. *Eur J Clin Nutr* 2005;59:1105-1111.
2. Ingram CJ, Mulcare CA, Itan Y, Thomas MG, Swallow DM. Lactose digestion and the evolutionary genetics of lactase persistence. *Hum Genet* 2009;124:579-591.
3. Lomer MC, Parkes GC, Sanderson JD. Review article: lactose intolerance in clinical practice--myths and realities. *Aliment Pharmacol Ther* 2008;27:93-103.
4. Matthews SB, Waud JP, Roberts AG, Campbell AK. Systemic lactose intolerance: a new perspective on an old problem. *Postgrad Med J* 2005;81:167-173.
5. Bersaglieri T, Sabeti PC, Patterson N, Vanderploeg T, Schaffner SF, Drake JA, Rhodes M, et al. Genetic signatures of strong recent positive selection at the lactase gene. *Am J Hum Genet* 2004;74:1111-1120.
6. Enattah NS, Sahi T, Savilahti E, Terwilliger JD, Peltonen L, Jarvela I. Identification of a variant associated with adult-type hypolactasia. *Nat Genet* 2002;30:233-237.
7. Tishkoff SA, Reed FA, Ranciaro A, Voight BF, Babbitt CC, Silverman JS, Powell K, et al. Convergent adaptation of human lactase persistence in Africa and Europe. *Nat Genet* 2007; 39:31-40.
8. Kuokkanen M, Enattah NS, Oksanen A, Savilahti E, Orpana A, Jarvela I. Transcriptional regulation of the lactase-phlorizin hydrolase gene by polymorphisms associated with adult-type hypolactasia. *Gut* 2003;52:647-652.
9. Lewinsky RH, Jensen TG, Moller J, Stensballe A, Olsen J, Troelsen JT. T-13910 DNA variant associated with lactase persistence interacts with Oct-1 and stimulates lactase promoter activity in vitro. *Hum Mol Genet* 2005;14:3945-3953.



- 1  
2  
3 10. Rasinpera H, Savilahti E, Enattah NS, Kuokkanen M, Totterman N, Lindahl H,  
4  
5 Jarvela I, et al. A genetic test which can be used to diagnose adult-type hypolactasia in  
6  
7 children. *Gut* 2004;53:1571-1576.
- 8  
9  
10 11. Shaw AD, Davies GJ. Lactose intolerance: problems in diagnosis and treatment.  
11  
12 *J Clin Gastroenterol* 1999;28:208-216.
- 13  
14  
15 12. Parker TJ, Woolner JT, Prevost AT, Tuffnell Q, Shorthouse M, Hunter JO.  
16  
17 Irritable bowel syndrome: is the search for lactose intolerance justified? *Eur J*  
18  
19 *Gastroenterol Hepatol* 2001;13:219-225.
- 20  
21  
22 13. Vesa TH, Seppo LM, Marteau PR, Sahi T, Korpela R. Role of irritable bowel  
23  
24 syndrome in subjective lactose intolerance. *Am J Clin Nutr* 1998;67:710-715.
- 25  
26  
27 14. Bode S, Gudmand-Hoyer E. Incidence and clinical significance of lactose  
28  
29 malabsorption in adult coeliac disease. *Scand J Gastroenterol* 1988;23:484-488.
- 30  
31  
32 15. Srinivasan U, Jones E, Weir DG, Feighery C. Lactase enzyme, detected  
33  
34 immunohistochemically, is lost in active celiac disease, but unaffected by oats  
35  
36 challenge. *Am J Gastroenterol* 1999;94:2936-2941.
- 37  
38  
39 16. Barr RG, Levine MD, Watkins JB. Recurrent abdominal pain of childhood due  
40  
41 to lactose intolerance. *N Engl J Med* 1979;300:1449-1452.
- 42  
43  
44 17. Peuhkuri K, Poussa T, Korpela R. Comparison of a portable breath hydrogen  
45  
46 analyser (Micro H2) with a Quintron MicroLyzer in measuring lactose maldigestion,  
47  
48 and the evaluation of a Micro H2 for diagnosing hypolactasia. *Scand J Clin Lab Invest*  
49  
50 1998;58:217-224.
- 51  
52  
53 18. Lomer MC, Parkes GC, Sanderson JD. Review article: lactose intolerance in  
54  
55 clinical practice - myths and realities. *Aliment Pharmacol Ther* 2007.
- 56  
57  
58  
59  
60

- 1  
2  
3  
4  
5  
6  
7  
8  
9  
10  
11  
12  
13  
14  
15  
16  
17  
18  
19  
20  
21  
22  
23  
24  
25  
26  
27  
28  
29  
30  
31  
32  
33  
34  
35  
36  
37  
38  
39  
40  
41  
42  
43  
44  
45  
46  
47  
48  
49  
50  
51  
52  
53  
54  
55  
56  
57  
58  
59  
60
19. Rosado JL, Solomons NW. Sensitivity and specificity of the hydrogen breath-analysis test for detecting malabsorption of physiological doses of lactose. *Clin Chem* 1983;29:545-548.
20. Barillas-Mury C, Solomons NW. Test-retest reproducibility of hydrogen breath test for lactose maldigestion in preschool children. *J Pediatr Gastroenterol Nutr* 1987;6:281-285.
21. Arola H, Koivula T, Jokela H, Jauhiainen M, Keyrilainen O, Ahola T, Uusitalo A, et al. Comparison of indirect diagnostic methods for hypolactasia. *Scand J Gastroenterol* 1988;23:351-357.
22. Jarvela IE. Molecular diagnosis of adult-type hypolactasia (lactase non-persistence). *Scand J Clin Lab Invest* 2005;65:535-539.
23. Bodlaj G, Stocher M, Hufnagl P, Hubmann R, Biesenbach G, Stekel H, Berg J. Genotyping of the lactase-phlorizin hydrolase -13910 polymorphism by LightCycler PCR and implications for the diagnosis of lactose intolerance. *Clin Chem* 2006;52:148-151.
24. Enattah NS, Kuokkanen M, Forsblom C, Natah S, Oksanen A, Jarvela I, Peltonen L, et al. Correlation of intestinal disaccharidase activities with the C/T-13910 variant and age. *World J Gastroenterol* 2007;13:3508-3512.
25. Schirru E, Corona V, Usai-Satta P, Scarpa M, Oppia F, Loriga F, Cucca F, et al. Genetic testing improves the diagnosis of adult type hypolactasia in the Mediterranean population of Sardinia. *Eur J Clin Nutr* 2007;61:1220-1225.
26. Satta PU, Congia M, Schirru E, Scarpa M, Mura G. Genetic testing is ready to change the diagnostic scenario of lactose malabsorption. *Gut* 2008;57:137-138; author reply 138.

- 1  
2  
3  
4  
5  
6  
7  
8  
9  
10  
11  
12  
13  
14  
15  
16  
17  
18  
19  
20  
21  
22  
23  
24  
25  
26  
27  
28  
29  
30  
31  
32  
33  
34  
35  
36  
37  
38  
39  
40  
41  
42  
43  
44  
45  
46  
47  
48  
49  
50  
51  
52  
53  
54  
55  
56  
57  
58  
59  
60
27. Lacassie Y, Weinberg R, Monckeberg F. Poor predictability of lactose malabsorption from clinical symptoms for Chilean populations. *Am J Clin Nutr* 1978;31:799-804.
28. Rana S, Bhasin DK, Gupta D, Mehta SK. Assessment of optimal dose of lactose for lactose hydrogen breath test in Indian adults. *Indian J Gastroenterol* 1995;14:13-14.
29. Miquel JF, Covarrubias C, Villaroel L, Mingrone G, Greco AV, Puglielli L, Carvallo P, et al. Genetic epidemiology of cholesterol cholelithiasis among Chilean Hispanics, Amerindians, and Maoris. *Gastroenterology* 1998;115:937-946.
30. Nervi F, Miquel JF, Alvarez M, Ferreccio C, Garcia-Zattera MJ, Gonzalez R, Perez-Ayuso RM, et al. Gallbladder disease is associated with insulin resistance in a high risk Hispanic population. *J Hepatol* 2006;45:299-305.
31. Cuevas A, Miquel JF, Reyes MS, Zanlungo S, Nervi F. Diet as a risk factor for cholesterol gallstone disease. *J Am Coll Nutr* 2004;23:187-196.
32. Buning C, Genschel J, Jurga J, Fiedler T, Voderholzer W, Fiedler EM, Worm M, et al. Introducing genetic testing for adult-type hypolactasia. *Digestion* 2005;71:245-250.
33. Bulhoes AC, Goldani HA, Oliveira FS, Matte US, Mazzuca RB, Silveira TR. Correlation between lactose absorption and the C/T-13910 and G/A-22018 mutations of the lactase-phlorizin hydrolase (LCT) gene in adult-type hypolactasia. *Braz J Med Biol Res* 2007;40:1441-1446.
34. Cook GC, al-Torki MT. High intestinal lactase concentrations in adult Arabs in Saudi Arabia. *Br Med J* 1975;3:135-136.
35. Charney M, McCracken RD. Intestinal lactase deficiency in adult nonhuman primates: implications for selection pressures in man. *Soc Biol* 1971;18:416-421.

- 1  
2  
3 36. Simoons FJ. Primary adult lactose intolerance and the milking habit: a problem  
4 in biologic and cultural interrelations. II. A culture historical hypothesis. *Am J Dig Dis*  
5 1970;15:695-710.  
6  
7  
8  
9  
10 37. Enattah NS, Sulkava R, Halonen P, Kontula K, Jarvela I. Genetic variant of  
11 lactase-persistent C/T-13910 is associated with bone fractures in very old age. *J Am*  
12 *Geriatr Soc* 2005;53:79-82.  
13  
14  
15  
16  
17 38. Obermayer-Pietsch BM, Gugatschka M, Reitter S, Plank W, Strele A, Walter D,  
18 Bonelli C, et al. Adult-type hypolactasia and calcium availability: decreased calcium  
19 intake or impaired calcium absorption? *Osteoporos Int* 2007;18:445-451.  
20  
21  
22  
23  
24 39. Rasinpera H, Forsblom C, Enattah NS, Halonen P, Salo K, Victorzon M,  
25 Mecklin JP, et al. The C/C-13910 genotype of adult-type hypolactasia is associated with  
26 an increased risk of colorectal cancer in the Finnish population. *Gut* 2005;54:643-647.  
27  
28  
29  
30  
31 40. Ojetti V, Nucera G, Migneco A, Gabrielli M, Lauritano C, Danese S, Zocco  
32 MA, et al. High prevalence of celiac disease in patients with lactose intolerance.  
33 *Digestion* 2005;71:106-110.  
34  
35  
36  
37  
38 41. Sahi T, Isokoski M, Jussila J, Launiala K. Lactose malabsorption in Finnish  
39 children of school age. *Acta Paediatr Scand* 1972;61:11-16.  
40  
41  
42  
43 42. Simoons FJ. Age of onset of lactose malabsorption. *Pediatrics* 1980;66:646-648.  
44  
45  
46 43. Wang Y, Harvey CB, Hollox EJ, Phillips AD, Poulter M, Clay P, Walker-Smith  
47 JA, et al. The genetically programmed down-regulation of lactase in children.  
48 *Gastroenterology* 1998;114:1230-1236.  
49  
50  
51  
52  
53 44. Laaksonen MM, Mikkila V, Rasanen L, Rontu R, Lehtimaki TJ, Viikari JS,  
54 Raitakari OT. Genetic lactase non-persistence, consumption of milk products and  
55 intakes of milk nutrients in Finns from childhood to young adulthood. *Br J Nutr* 2009:1-  
56  
57  
58  
59  
60 10.

1  
2  
3 45. Torniaainen S, Hedelin M, Autio V, Rasinpera H, Balter KA, Klint A, Bellocco  
4  
5 R, et al. Lactase persistence, dietary intake of milk, and the risk for prostate cancer in  
6  
7 Sweden and Finland. *Cancer Epidemiol Biomarkers Prev* 2007;16:956-961.  
8

9  
10 46. Lehtimaki T, Hemminki J, Rontu R, Mikkila V, Rasanen L, Laaksonen M,  
11  
12 Hutri-Kahonen N, et al. The effects of adult-type hypolactasia on body height growth  
13  
14 and dietary calcium intake from childhood into young adulthood: a 21-year follow-up  
15  
16 study--the Cardiovascular Risk in Young Finns Study. *Pediatrics* 2006;118:1553-1559.  
17  
18

19 47. Castillo C, Atalah E, Benavides X, Urteaga C. [Food patterns among adults  
20  
21 visiting primary care clinics in the metropolitan region]. *Rev Med Chil* 1997;125:283-  
22  
23 289.  
24  
25  
26  
27  
28  
29  
30  
31  
32  
33  
34  
35  
36  
37  
38  
39  
40  
41  
42  
43  
44  
45  
46  
47  
48  
49  
50  
51  
52  
53  
54  
55  
56  
57  
58  
59  
60

1  
2  
3  
4  
5 **Figure 1.** RFLP and sequence analysis of a 448 bp region of MCM6 intron 13  
6 containing the LCTC>T<sub>-13910</sub> SNP. Upper panel: RFLP analysis of the 448 bp amplicon  
7 digested with BsmFI. Left lane, 50-bp DNA ladder. Right lane, undigested PCR  
8 amplicon. Center lanes, digested products from representative individuals having the  
9 three different SNP genotypes. The ancestral LCT-13910CC genotype results in two  
10 bands of 350 bp and 110 bp; LCT-13910CT genotype results in three bands of 350 bp,  
11 240 bp and 110 bp; LCT-13910TT genotype results in two bands of 240 bp and 110 bp.  
12 Lower panel: Representative sequence tracings showing confirmation of RFLP data.  
13 Direct sequence analysis was performed on 35 of the 51 samples.  
14  
15  
16  
17  
18  
19  
20  
21  
22  
23  
24  
25  
26  
27  
28  
29

30 **Figure 2.** De Finetti diagram for the LCTC>T<sub>-13910</sub> SNP in Hispanic (black  
31 dotted line) and Amerindian (blue dotted line) populations. The diagram shows  
32 genotype and allele frequencies. The frequencies of homozygous genotypes are plotted  
33 on the left and right diagonal axes, the frequencies of heterozygous genotypes are  
34 plotted on the left and right diagonal axes, the frequencies of heterozygous genotypes are  
35 plotted on the vertical axis, and the allele frequencies are depicted by the interaction of  
36 the vertical dotted lines with the bottom perpendicular (allele 1 = C<sub>-13910</sub>). The genotype  
37 frequencies plot on the parabola in the diagram, indicating that Amerindians are, but  
38 Hispanics are not, in Hardy-Weinberg equilibrium (Hardy-Weinberg parabola). The  
39 diagram was plotted using the software package developed by T.M. Strom and T.F.  
40 Wienker (<http://ihg.gsf.de/cgi-bin/hw/hwal.pl>).  
41  
42  
43  
44  
45  
46  
47  
48  
49  
50  
51  
52  
53  
54  
55  
56  
57  
58  
59  
60

STROBE Statement—Checklist of items that should be included in reports of *case-control studies*

| Section/Topic            | Item # | Recommendation                                                                                                                                                                       | Reported on page # |
|--------------------------|--------|--------------------------------------------------------------------------------------------------------------------------------------------------------------------------------------|--------------------|
| Title and abstract       | 1      | (a) Indicate the study's design with a commonly used term in the title or the abstract                                                                                               | 2                  |
|                          |        | (b) Provide in the abstract an informative and balanced summary of what was done and what was found                                                                                  | 2                  |
| <b>Introduction</b>      |        |                                                                                                                                                                                      |                    |
| Background/rationale     | 2      | Explain the scientific background and rationale for the investigation being reported                                                                                                 | 6                  |
| Objectives               | 3      | State specific objectives, including any prespecified hypotheses                                                                                                                     | 7                  |
| <b>Methods</b>           |        |                                                                                                                                                                                      |                    |
| Study design             | 4      | Present key elements of study design early in the paper                                                                                                                              | 9                  |
| Setting                  | 5      | Describe the setting, locations, and relevant dates, including periods of recruitment, exposure, follow-up, and data collection                                                      | 9                  |
| Participants             | 6      | (a) Give the eligibility criteria, and the sources and methods of case ascertainment and control selection. Give the rationale for the choice of cases and controls                  | 9-10               |
|                          |        | (b) For matched studies, give matching criteria and the number of controls per case                                                                                                  |                    |
| Variables                | 7      | Clearly define all outcomes, exposures, predictors, potential confounders, and effect modifiers. Give diagnostic criteria, if applicable                                             | 9-10               |
| Data sources/measurement | 8*     | For each variable of interest, give sources of data and details of methods of assessment (measurement). Describe comparability of assessment methods if there is more than one group | 9-10               |
| Bias                     | 9      | Describe any efforts to address potential sources of bias                                                                                                                            | 4                  |
| Study size               | 10     | Explain how the study size was arrived at                                                                                                                                            | 9                  |
| Quantitative variables   | 11     | Explain how quantitative variables were handled in the analyses. If applicable, describe which groupings were chosen and why                                                         | 10                 |

|                     |     |                                                                                                                                                                                                              |       |
|---------------------|-----|--------------------------------------------------------------------------------------------------------------------------------------------------------------------------------------------------------------|-------|
| Statistical methods | 12  | (a) Describe all statistical methods, including those used to control for confounding                                                                                                                        | 10    |
|                     |     | (b) Describe any methods used to examine subgroups and interactions                                                                                                                                          | n.a.  |
|                     |     | (c) Explain how missing data were addressed                                                                                                                                                                  | n.a.  |
|                     |     | (d) If applicable, explain how matching of cases and controls was addressed                                                                                                                                  | n.a.  |
|                     |     | (e) Describe any sensitivity analyses                                                                                                                                                                        | n.a.  |
| <b>Results</b>      |     |                                                                                                                                                                                                              |       |
| Participants        | 13* | (a) Report numbers of individuals at each stage of study—eg numbers potentially eligible, examined for eligibility, confirmed eligible, included in the study, completing follow-up, and analyzed            | n.a.  |
|                     |     | (b) Give reasons for non-participation at each stage                                                                                                                                                         | n.a.  |
|                     |     | (c) Consider use of a flow diagram                                                                                                                                                                           | n.a.  |
| Descriptive data    | 14* | (a) Give characteristics of study participants (eg demographic, clinical, social) and information on exposures and potential confounders                                                                     | 12,26 |
|                     |     | (b) Indicate number of participants with missing data for each variable of interest                                                                                                                          | n.a.  |
| Outcome data        | 15* | Report numbers in each exposure category, or summary measures of exposure                                                                                                                                    | 13,28 |
| Main results        | 16  | (a) Give unadjusted estimates and, if applicable, confounder-adjusted estimates and their precision (eg, 95% confidence interval). Make clear which confounders were adjusted for and why they were included | n.a.  |
|                     |     | (b) Report category boundaries when continuous variables were categorized                                                                                                                                    | n.a.  |
|                     |     | (c) If relevant, consider translating estimates of relative risk into absolute risk for a meaningful time period                                                                                             | n.a.  |
| Other analyses      | 17  | Report other analyses done—eg analyses of subgroups and interactions, and sensitivity analyses                                                                                                               | n.a.  |
| <b>Discussion</b>   |     |                                                                                                                                                                                                              |       |
| Key results         | 18  | Summarize key results with reference to study objectives                                                                                                                                                     | 16,17 |
| Limitations         | 19  | Discuss limitations of the study, taking into account sources of                                                                                                                                             | 16    |



|                          |    |                                                                                                                                                                            |       |
|--------------------------|----|----------------------------------------------------------------------------------------------------------------------------------------------------------------------------|-------|
|                          |    | potential bias or imprecision.<br><br>Discuss both direction and magnitude of any potential bias                                                                           |       |
| Interpretation           | 20 | Give a cautious overall interpretation of results considering objectives, limitations, multiplicity of analyses, results from similar studies, and other relevant evidence | 17,18 |
| Generalisability         | 21 | Discuss the generalisability (external validity) of the study results                                                                                                      | 18    |
| <b>Other information</b> |    |                                                                                                                                                                            |       |
| Funding                  | 22 | Give the source of funding and the role of the funders for the present study and, if applicable, for the original study on which the present article is based              | 18    |

\*Give information separately for cases and controls in case-control studies and, if applicable, for exposed and unexposed groups in cohort and cross-sectional studies.

**Note:** An Explanation and Elaboration article discusses each checklist item and gives methodological background and published examples of transparent reporting. The STROBE checklist is best used in conjunction with this article (freely available on the Web sites of PLoS Medicine at <http://www.plosmedicine.org/>, Annals of Internal Medicine at <http://www.annals.org/>, and Epidemiology at <http://www.epidem.com/>). Information on the STROBE Initiative is available at [www.strobe-statement.org](http://www.strobe-statement.org).

1  
2  
3  
4  
5  
6  
7  
8  
9  
10  
11  
12  
13  
14  
15  
16  
17  
18  
19  
20  
21  
22  
23  
24  
25  
26  
27  
28  
29  
30  
31  
32  
33  
34  
35  
36  
37  
38  
39  
40  
41  
42  
43  
44  
45  
46  
47  
48  
49  
50  
51  
52  
53  
54  
55  
56  
57  
58  
59  
60

Figure 1

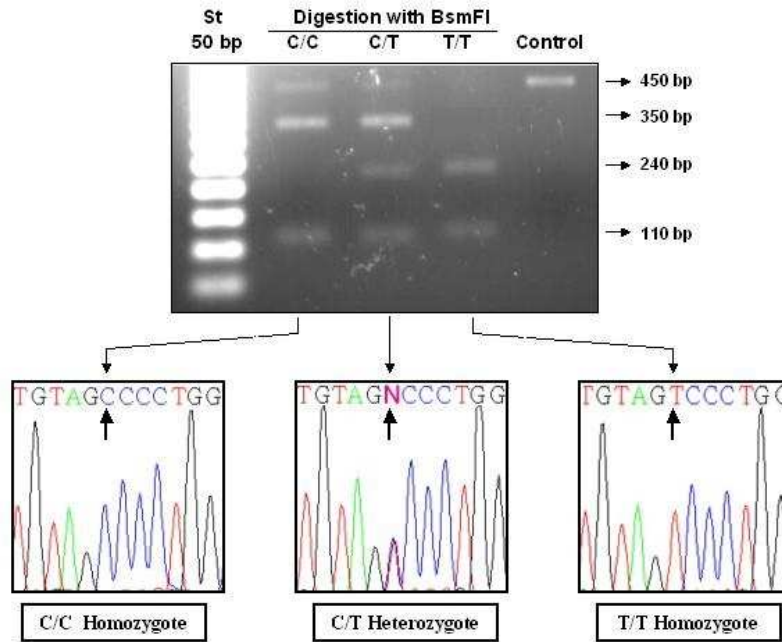

254x190mm (72 x 72 DPI)

Review only

Figure 2

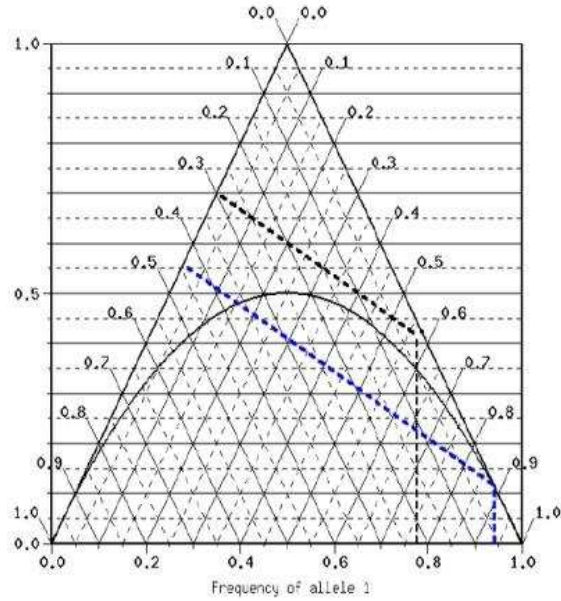

254x190mm (72 x 72 DPI)

Review only

1  
2  
3  
4  
5  
6  
7  
8  
9  
10  
11  
12  
13  
14  
15  
16  
17  
18  
19  
20  
21  
22  
23  
24  
25  
26  
27  
28  
29  
30  
31  
32  
33  
34  
35  
36  
37  
38  
39  
40  
41  
42  
43  
44  
45  
46  
47  
48  
49  
50  
51  
52  
53  
54  
55  
56  
57  
58  
59  
60

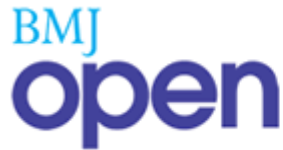

**The European lactase persistence genotype determines lactase persistence state and correlates with gastrointestinal symptoms in the Hispanic and Amerindian Chilean population.**

|                               |                                                                                                                                                                                                                                                                                                                                                                                                                                                                              |
|-------------------------------|------------------------------------------------------------------------------------------------------------------------------------------------------------------------------------------------------------------------------------------------------------------------------------------------------------------------------------------------------------------------------------------------------------------------------------------------------------------------------|
| Journal:                      | <i>BMJ Open</i>                                                                                                                                                                                                                                                                                                                                                                                                                                                              |
| Manuscript ID:                | bmjopen-2011-000125.R1                                                                                                                                                                                                                                                                                                                                                                                                                                                       |
| Article Type:                 | Research                                                                                                                                                                                                                                                                                                                                                                                                                                                                     |
| Date Submitted by the Author: | 10-May-2011                                                                                                                                                                                                                                                                                                                                                                                                                                                                  |
| Complete List of Authors:     | Morales, Eugenia; Pontificia Universidad Catolica de Chile, Gastroenterology<br>Azocar, Lorena; Pontificia Universidad Catolica de Chile, Gastroenterology<br>Maul, Ximena; Pontificia Universidad Catolica de Chile, Medical student<br>Perez, Claudio; Pontificia Universidad Catolica de Chile, Medical student<br>Chianale, Jose; Pontificia Universidad Catolica de Chile, Gastroenterology<br>Miquel, Juan; Pontificia Universidad Catolica de Chile, Gastroenterology |
| <b>Subject Heading</b> :      | Gastroenterology                                                                                                                                                                                                                                                                                                                                                                                                                                                             |
| Keywords:                     | lactose intolerance, lactase persistence state, -13910T variant, IBS                                                                                                                                                                                                                                                                                                                                                                                                         |
|                               |                                                                                                                                                                                                                                                                                                                                                                                                                                                                              |

SCHOLARONE™  
Manuscripts

1  
2  
3 **The European lactase persistence genotype determines lactase persistence state**  
4 **and correlates with gastrointestinal symptoms in the Hispanic and Amerindian**  
5 **Chilean population.**  
6  
7  
8  
9

10  
11  
12  
13 Eugenia Morales<sup>1</sup>, Lorena Azocar<sup>1</sup>, Ximena Maul<sup>2</sup>, Claudio Perez<sup>2</sup>, José Chianale<sup>1</sup>,  
14  
15 Juan Francisco Miquel<sup>1\*</sup>.  
16

17  
18  
19 Department of Gastroenterology<sup>1</sup>, Medical Students<sup>2</sup>, Faculty of Medicine, Pontificia  
20  
21 Universidad Católica de Chile.  
22  
23

24  
25 **Keywords:** lactose intolerance, lactase persistence state, -13910T variant, IBS.  
26  
27

28  
29 **\*Correspondence:**  
30

31  
32 Juan Francisco Miquel, MD  
33

34  
35 Marcoleta 367, Santiago  
36

37  
38 Telephone: 56 2 3543830  
39

40  
41 Fax: 56 2 6397780  
42

43  
44 e-mail: jfmiquel@med.puc.cl  
45  
46  
47  
48  
49

50 **Word count: 3,359**  
51  
52

53  
54 **List of abbreviations:** LP, lactase persistent state; LNP, lactase non-persistent state;  
55  
56 LCT, lactase-phlorizin hydrolase; HBT, hydrogen breath test; SNP, single nucleotide  
57  
58 polymorphism.  
59  
60

## Abstract

**Background:** The lactase persistent (LP) or lactase non persistent (LNP) state in European adults is genetically determined by a single nucleotide polymorphism (SNP) located 13.9 kb upstream of the lactase (LCT) gene, known as LCT C>T<sub>-13910</sub> (rs4988235). The LNP condition causes an inability to digest the milk sugar lactose leading to gastrointestinal symptoms and can affect nutrient and calcium intake in certain populations. **Objectives:** We studied a group of 51 Chilean patients to assess whether this SNP influences the LP/LNP state in this population, and determined the prevalence of LCT C>T<sub>-13910</sub> genotypes in a representative sample of 216 Hispanics and 43 Amerindians with correlation to digestive symptoms. **Design:** Case-Control study done in Chilean patients with clinical suspicion of LNP that were assessed using clinical survey, hydrogen breath test (HBT), and SNP genotyping. The population sample of Hispanics and Amerindians was assessed by clinical survey and SNP genotyping. **Results:** Of the 51 patients with clinical suspicion of LNP, 29 were HBT positive. The CC genotype (LNP) was present in 89.7% of the patients with positive HBT and in only 4.7% of those with negative HBT. The prevalence of the CC genotype was 56.9% in the Hispanic population and 88.3% in Amerindians and was associated with a higher self reported clinical intolerance to dairies ingestion. **Conclusion:** The LP/LNP state is determined by the LCT C>T<sub>-13910</sub> variant in Chileans. This variant predicts digestive symptoms associated with the ingestion of lactose and is a good tool for the diagnosis of primary adult hypolactasia. The LCT T<sub>-13910</sub> allele is rare in the Amerindian population and is suggestive of European ancestry in this contemporary population.

## ARTICLE SUMMARY

**Article focus:** The aims of the present study were three questions; 1) If the European variant C/T-13910 determined lactose-persistent and lactose non-persistent state in adult Chilean Hispanic and Amerindian population; 2) If there is a correlation between the C/T-13910 genotyping and the hydrogen breath test (HBT) for diagnosis of LNP in our population; 3) To determine for the first time in an Latin American population the prevalence of the lactose non-persistence genotype (CC) and its correlation with digestive symptoms and ingestion of dairy products.

**Significance of the study:** The three key messages of the present study were: 1) We demonstrate for the first time that the European lactase persistence -13910T variant determines lactase persistence in the Chilean Hispanic and Amerindian population. 2) We demonstrate a strong correlation between the C-13910>T genotype with the hydrogen breath test and lactose tolerance in a group of patients with clinical suspicion of lactose intolerance. 3) In a representative sample of the Hispanic Chilean population (Mestizos) and in Amerindians, we observed a high prevalence of the lactose non-persistence genotype (CC) with a clear gradient between ethnic groups (56% and 88%, respectively). Interestingly, C-13910>T genotype was significantly associated with digestive symptoms and self reporting intolerance to dairy ingestion. This could explain the observed low consumption of dairy products (30 L milk/person/year) in our population.

### Strengths and limitations of the study:

- Our strengths:

- This is the first study in Latin America that assesses if the European lactase persistence -13910T variant determines lactase persistence in the Chilean Hispanic and Amerindian general population.
- Our results may be of clinical and epidemiological relevance, not only for the Chilean population, but also for other Hispanic and Amerindian populations of the Americas with similar genetic background. The fact that the LNP state is an inherited frequent condition in Mestizo and Amerindians should be considered when developing public programs that encourage consumption of dairy products, and should be a stimulus for the food industry to develop new and high quality lactose-free dairy products in these regions.
- We randomly selected a representative sample of the Hispanic Chilean population (n=216) and Amerindians (n=43), and performed the genotyping of LCT C>T<sub>-13910</sub>. We observed a high prevalence of the lactose non-persistence genotype (CC) with a clear gradient between both ethnic groups (56% and 88%, respectively), that correlates with digestive symptoms and self reporting intolerance to dairy ingestion.

- **Our limitations:**

- **Non** randomized recruitment of the 51 patients with suspicion of lactose intolerance could induce selection bias.
- A small number of patients with suspicion of lactose intolerance (n= 51).



- Semi-quantitative food frequency questionnaire with a 24 h dietary recall obtained in a subgroup of the Hispanics and performed years before the genetic analysis.

For peer review only

1  
2  
3  
4  
5  
6  
7  
8  
9  
10  
11  
12  
13  
14  
15  
16  
17  
18  
19  
20  
21  
22  
23  
24  
25  
26  
27  
28  
29  
30  
31  
32  
33  
34  
35  
36  
37  
38  
39  
40  
41  
42  
43  
44  
45  
46  
47  
48  
49  
50  
51  
52  
53  
54  
55  
56  
57  
58  
59  
60

## INTRODUCTION

Lactose, the main sugar in milk, must be hydrolyzed by lactase-phlorizin hydrolase into glucose and galactose for absorption. Intestinal activity of the lactase enzyme (LCT) (MIM 603202) decreases in all mammals after weaning, resulting in poor lactose absorption (1). In humans this condition is termed “lactase non-persistence” (LNP), “adult type hypolactasia” (MIM 223100) and is estimated to occur in approximately 65% of the contemporary world population (2, 3). LNP can generate intolerance to the ingestion of dairies with the development of abdominal and systemic symptoms that lead to medical consultations and evaluations. In contrast, lactase persistent (LP) individuals remain tolerant of lactose and maintain high levels of LCT expression throughout adult life (4). The prevalence of the LP phenotype, which is an autosomal dominant condition (MIM 223100) is reported to vary between 0 and 95% in different populations (3), but is unknown in contemporary Latin American populations (2, 5).

The recent discovery of single nucleotide polymorphisms (SNPs) that determine the LP state in humans, both in Europe (6) and among some pastoral populations in Africa, has generated growing interest in the study of this condition (2, 7). The appearance of these SNPs seems to have occurred on more than one occasion in human evolution between 1,500 and 12,000 y ago in northern Europe and among some nomadic populations of Asia and Africa (7). The SNP known as LCT C>T<sub>-13910</sub> (rs4988235) is located 13.9 kb upstream of the LCT gene in the 13<sup>th</sup> intron of an adjacent gene (MCM6). The T allele of this SNP correlates with the LP state in European populations (6), and individuals with this allele have higher levels of LCT transcripts in enterocytes compared to individuals who carry the C allele (8). *In vitro* studies show that cells transfected with the LCT T<sub>-13910</sub> variant show increased activity

1  
2  
3 of the LCT promoter (9). Another SNP known as LCT G>A<sub>22018</sub>, shows some  
4  
5 association with the LP/LNP phenotype, and while it does not appear to be the causal  
6  
7 variant, it is present in a block of linkage disequilibrium with little evidence of  
8  
9 recombination in this region of the genome (5, 10).  
10  
11

12  
13 In clinical practice, the LNP state is relevant because it can generate  
14  
15 malabsorption and intolerance of lactose, with the development of clinical symptoms  
16  
17 such as abdominal pain and distension, diarrhea, bloating, nausea, and vomiting (3). A  
18  
19 significant percentage of patients do not relate these symptoms to dairies ingestion (11),  
20  
21 and the recurring nature of the symptoms can lead to misdiagnosis of chronic diarrhea,  
22  
23 irritable bowel syndrome, celiac illness, or other clinical conditions (12-16). The  
24  
25 diagnosis of LNP is often based on clinical suspicion and the favorable response to a  
26  
27 lactose restricted diet.  
28  
29  
30

31  
32 The most widely used diagnostic test of poor lactose absorption is the hydrogen  
33  
34 breath test (HBT) (11, 17). Nevertheless, this test has practical limits and its sensitivity  
35  
36 and specificity varies between 69 - 100% and 89 - 100%, respectively, compared to  
37  
38 measurement of LCT activity in intestinal biopsies. Additionally, there is a false  
39  
40 negative rate of 11 - 30%, and a false positive rate of up to 57% using this test (18-20).  
41  
42 Using SNP genotyping in patients with suspected LNP may therefore aid in proper  
43  
44 diagnosis (10, 21-25). The only epidemiological study of adult hypolactasia in a Chilean  
45  
46 population was performed more than three decades ago (26) and suggested that the  
47  
48 prevalence of LNP was 56% and 75% for the pediatric and adult populations,  
49  
50 respectively. Our objectives were to determine the influence of the LCT C>T<sub>13910</sub> SNP  
51  
52 on the LP/LNP state in the Chilean population and to determine the population  
53  
54 prevalence of the SNP genotypes in a representative Hispanic and Amerindian  
55  
56  
57  
58  
59  
60

1  
2  
3 population with comparison of the genotypes to clinical symptoms related to dairies  
4  
5  
6 ingestion.  
7  
8  
9  
10  
11  
12  
13  
14  
15  
16  
17  
18  
19  
20  
21  
22  
23  
24  
25  
26  
27  
28  
29  
30  
31  
32  
33  
34  
35  
36  
37  
38  
39  
40  
41  
42  
43  
44  
45  
46  
47  
48  
49  
50  
51  
52  
53  
54  
55  
56  
57  
58  
59  
60

For peer review only

## **SUBJECTS AND METHODS**

### **Patients with clinical suspicion of lactase non persistence (LNP).**

In 2006, 51 patients were enrolled in a prospective study after being referred to the Gastroenterological Department of the Clinical Hospital at the Pontificia Universidad Catolica de Chile because of symptoms suggestive of LNP. A pre-coded survey was obtained from all patients to obtain demographic, anthropometric, familial, and clinical data, including any symptoms experienced during the diagnostic hydrogen breath test (HBT) such as abdominal pain, diarrhea, bloating, nausea, and vomiting. A 5 ml EDTA blood sample was obtained to extract DNA. Serum levels of immunoglobulin A and tissue anti-transglutaminase antibodies (hu tTG ELISA, IMMCO Diagnostics, Inc., Buffalo, NY) were quantified in all the patients to rule out the existence of celiac disease. This study was approved by the Ethics Committee of the Faculty of Medicine, PUC, and all patients signed a written informed consent form prior to the study.

### **Hydrogen breath test (HBT) for diagnosis of LNP.**

Patients were instructed to maintain a low fiber diet without lactose for 48 h prior to the day of the examination. After 12 h of fasting, a baseline concentration of H<sub>2</sub> in exhaled breath was determined using a Quintron® microLyzer (QuinTron Instrument Company, Milwaukee, WI). Subjects then ingested 25 g lactose and H<sub>2</sub> concentration in breath was quantified every 20 m for a maximum of 4 h. Individuals were considered LNP with an increase in H<sub>2</sub> concentration 20 ppm above the base value (17, 27).

### **Population study.**

A representative sample of 216 unrelated Hispanics and 43 unrelated Amerindians were randomly selected from an initial sample of 1581 Hispanics and 120 Amerindians (Mapuches, the Chilean native population) which were collected between 1993 and

2000 as described previously (28, 29). By using an Amerindian Admixture Index based on ABO blood group distribution, we have previously demonstrated in these cohorts a 40% and 80% Amerindian ancestry in the Hispanic and Mapuche population, respectively. Furthermore, 88% of Hispanics and 100% of Mapuches shared ancestral Amerindian mtDNA polymorphism (29). These results were in accordance with the biparental founder origin of the mixed Chilean population, which could be similar to other Hispanic populations from America (30-32).

The sample size was selected by estimating an expected prevalence of the LCT-13910CC genotype to be at least 50% in the Hispanic population and 80% in the Amerindians, with an alpha error of 5% and a level of confidence of 80%. All study subjects provided a DNA sample and a medical survey that provided anthropometric and clinical data including information about diarrhea, abdominal pain, or bloating in response to ingestion of dairy products (28, 29). Furthermore, a subgroup of the Hispanic subjects provided a semi-quantitative food frequency questionnaire with a 24 h dietary recall. From this data, specific energy and nutrient ingestion from dairy products was estimated using the Datadiet program (28, 33). For all subjects, the occurrences of digestive symptoms in response to consumption of lactose were correlated to SNP genotyping results.

#### **Genotyping of LCT C>T<sub>-13910</sub> and LCT G>A<sub>-22018</sub> SNPs**

SNP genotyping was performed using PCR-RFLP methods (34) (GenBank reference sequence NM\_005915.4). Briefly, genomic DNA was extracted from 300 µl of blood according to manufacturer's instructions (Wizard SV Genomic DNA Purification System, Promega, Madison, WI) and the regions surrounding the SNPs were amplified through PCR using primers (F) 5'-GGA TGC ACT GCT GTG ATG AG-3' and (R) 5-CCC ACT GAC CTA TCC TCG TG-3' for the LCT C>T<sub>-13910</sub> and (F) 5'-AAC AGG

1  
2  
3 CAC GTG GAG GAG TT-3' and (R) 5'- CCC ACC TCA GCC TCT TGA GT-3' for  
4  
5 LCT G>A <sub>-22018</sub> . In both cases, the amplified products were of 448 bp. The PCR  
6  
7 reactions and RFLP assays for the analysis of both genetic variants was carried out as  
8  
9 described previously (34). Briefly, the amplified product for the LCT C>T <sub>-13910</sub> SNP  
10  
11 was digested with *BsmFI*, generating two fragments of 351 and 97 bp in the presence of  
12  
13 the CC genotype, and 3 fragments of 253, 98, and 97 bp in the presence of the TT  
14  
15 genotype (**Figure 1**). For the LCT G>A <sub>-22018</sub> SNP, the PCR product was digested with  
16  
17 *HhaI*, generating two fragments of 284 and 184 bp in the presence of the GG genotype  
18  
19 and one undigested fragment of 448 bp in the presence of the A/A genotype. The  
20  
21 amplified and digested PCR products were separated by electrophoresis on 2% agar gels  
22  
23 in 1X TAE buffer stained with ethidium bromide. Genotyping confirmation was carried  
24  
25 out on 35 samples by direct sequencing of the 448 bp amplified fragments (models  
26  
27 ABI-310 and ABI-3100 automated DNA sequencers, Applied Biosystems, Foster City,  
28  
29 CA) (**Figure 1**). There was complete concordance between the PCR-RFLP analysis and  
30  
31 the sequencing in all cases.  
32  
33  
34  
35  
36  
37  
38  
39

#### 40 **Statistical analysis**

41  
42 Mean and standard deviations were used to describe numeric variables. The variables of  
43  
44 categorical types are given as a number and a percentage. Comparisons of continuous  
45  
46 variables were performed using the student T test for independent samples.  
47  
48 Comparisons of categorical variables were carried out using the chi-square test. Using  
49  
50 the HBT breath test as diagnostic for LNP, an analysis was made of the sensitivity and  
51  
52 specificity of the genetic test as an alternative diagnostic test. Differences were  
53  
54 considered significant when  $p < 0.05$ .  
55  
56  
57  
58  
59  
60

## RESULTS

### **Hydrogen breath test and SNP genotyping**

Fifty-one patients with clinical suspicion of LNP (44 women and 7 men, age 14 - 79 y) were included in the study. Twenty-nine patients (56.8%) had a positive HBT and 22 were negative (43.2%) (**Table 1**). There were no significant differences in the distribution by sex and age between the two groups. There was a positive correlation between the HBT results and digestive symptoms reported during the test: 82% of the patients with positive HBT had symptoms associated with the lactose load, such as bloating, abdominal pain, and diarrhea (79%, 58% and 20%, respectively). In contrast, only 27% of the patients with negative HBT presented symptoms after ingesting lactose ( $p < 0.001$ ). Additionally, 76% of patients with positive HBT indicated a personal and/or family history of functional digestive disorders, compared to 36% of those with negative HBT ( $p < 0.001$ ).

The LCTC>T<sub>-13910</sub> SNP genotyping results for the 51 patients is shown in Table 1. Of the 29 patients with positive HBT, 26 (89.7%) had the LCT-13910CC genotype (the LNP genotype), and 3 (10.3%) had the LCT-13910CT genotype and were therefore phenotypically LNP but genotypically LP. However, two of these 3 patients experienced bloating and diarrhea during the HBT, which suggests malabsorption of lactose. Of the 22 patients who had a negative HBT, 19 were LCT-13910CT, two were LCT-13910TT, and a single 16-year-old patient had the LNP LCT-13910CC genotype (Table 1). However, this patient experienced abdominal pain during the HBT. Subsequent evaluation of this patient with a lactulose HBT (10 g load) revealed that this patient was not a non-producer of hydrogen. A single patient with LNP genotype and positive HBT had high levels of anti-tTG (27  $\mu$ U/ml), which suggests the possibility of



1  
2  
3 coexistence of LNP and celiac disease. All the patients showed normal levels of serum  
4  
5 IgA (data not shown).  
6

7  
8 There was complete genotypic correlation between the LCTC>T<sub>-13910</sub> and the LCTG>A.  
9  
10 <sub>22018</sub> SNPs, such that any subject homozygous or heterozygous for one SNP was at the  
11  
12 same time homozygous or heterozygous for the other SNP (data not shown).  
13  
14 Furthermore, there was good correlation between the LCTC>T<sub>-13910</sub> SNP findings and  
15  
16 the HBT test results (**Table 2**). Genotyping results were confirmed by sequencing for 35  
17  
18 of the 51 samples (**Figure 2**). Interestingly, one of the three discordant patients with  
19  
20 LNP phenotype but LP genotype was also heterozygous at a second location not  
21  
22 previously described in the literature, LCTG>A<sub>-13937</sub>.  
23  
24  
25  
26  
27

### 28 **Population study**

29  
30 We collected DNA samples and medical surveys from 216 unrelated Hispanic  
31  
32 individuals and 43 unrelated Amerindians. The survey information is summarized in  
33  
34 **Table 3**. The two groups were similar in age, with higher representation of females  
35  
36 among the Amerindians. The Amerindian cohort reported a higher frequency of  
37  
38 intolerance to ingesting dairy products and recurring diarrhea while both groups  
39  
40 reported recurring abdominal bloating with equal frequency.  
41  
42  
43

44  
45 The genotype and allele frequencies for the LCTC>T<sub>-13910</sub> SNP are shown in **Table 3**.  
46  
47 As was found in the study group of 51 Chilean patients with suspected lactose  
48  
49 intolerance, there was complete concordance between the genotypes of the LCTC>T.  
50  
51 <sub>13910</sub> and LCTG>A<sub>-22018</sub> SNPs in each individual (data not shown). The cohort of  
52  
53 Amerindian individuals was in Hardy-Weinberg equilibrium (**Figure 2**), but we  
54  
55 observed a slightly higher than expected frequency of the T<sub>-13910</sub> allele in the Hispanic  
56  
57 population (deviation from HW equilibrium  $p < 0.05$ ). ). **Interestingly, this deviation**  
58  
59 **from HW equilibrium has also been observed in other mixed ethnicity groups (3, 35).**  
60

1  
2  
3 The prevalence of the ancestral LCT-13910CC genotype (the LNP genotype) was  
4  
5 56.9%, significantly lower than the prevalence of this genotype among the Amerindian  
6  
7 individuals (88.3%). In turn, 41.7% of the Hispanics were LCT-13910CT genotype  
8  
9 compared to only 11.7% of the Amerindians. The LCT-13910TT genotype was found in  
10  
11 only 3 Hispanic subjects. Allele frequencies for the LCTC>T<sub>-13910</sub> SNP were  
12  
13 significantly different between the two groups, with the T<sub>-13910</sub> allele being very  
14  
15 infrequent in Amerindians.  
16  
17  
18

19  
20 For the 216 Hispanic individuals studied, we were able to gather clinical and genetic  
21  
22 data (**Table 3**). Individuals with the LNP LCT-13910CC genotype were 3 times more  
23  
24 likely to report intolerance to the ingestion of dairy products and recurring diarrhea than  
25  
26 those with LP genotypes (LCT-13910CT or LCT-13910TT). For 112 of these  
27  
28 individuals, we collected complete nutritional information. The consumption of dairy  
29  
30 products was in general very low, equivalent to an average of 30 L of fresh milk per  
31  
32 year per person. However, the group of individuals with an LP genotype had 38%  
33  
34 higher consumption of dairy products than the group of individuals with the LNP  
35  
36 genotype (38.4 L ± 67 L versus 27.7 L ± 40 L milk/year, respectively), although this  
37  
38 difference was not statistically significant.  
39  
40  
41  
42  
43  
44  
45  
46  
47  
48  
49  
50  
51  
52  
53  
54  
55  
56  
57  
58  
59  
60

## DISCUSSION

The normal physiologic decrease in lactase (LCT) production in the mammalian intestine following weaning is known as lactase non persistence (LNP), and results in the inability to digest the milk sugar, lactose, which can cause gastrointestinal symptoms after ingestion of dairies. The condition of lactase persistence (LP), found only in humans, allows the individual to continue to ingest and absorb lactose into adulthood. In European populations and some Afro-Arab pastoral groups, the LP condition has been shown to be due to SNP's found 13.9 kb upstream of the LCT gene and actually located within the 13<sup>th</sup> intron of the MCM6 gene. One of these SNP's, LCTC>T<sub>-13910</sub> (rs4988235), appeared approximately 10,000y ago in the human history and, has spread progressively from Northern Europe through the world due to population migration and mixing, increasing the state of LP in different populations (2). The original populations of the Americas and Asia were likely LNP. There is no evidence of the existence of American variants that might have generated the LP state in the pre-Columbian era (2, 5). The T<sub>-13910</sub> allele, which leads to the LP state, was likely introduced to the Americas by the migration of European carriers of this variant approximately 500 years ago and spread rapidly in the descending admixed Hispanic (Mestizo) populations of contemporary America, as is shown in this study as well as others (5, 36).

Our study of a representative population of Chile consisting of Hispanic and Amerindian individuals showed the prevalence of the LNP state (LCT-13910CC genotype) to be 57% and 88%, respectively. It is interesting to note that this observed genotypic frequency is very similar to the Amerindian admixture index (AAI) estimated by us in these same populations based on the distribution of ABO blood groups (28).

1  
2  
3 This suggests that the analysis of the LCTC>T<sub>-13910</sub> SNP in Latin American populations  
4 can be a good indicator of the degree of Amerindian or Caucasian inheritance.  
5

6  
7  
8 In all Chilean patients genotyped in this study, the LCTG>A<sub>-22018</sub> SNP genotype  
9 correlated completely with the genotype found for the LCTC>T<sub>-13910</sub> SNP, a finding  
10 reported in many studies. This phenomenon can be explained by the fact that both SNPs  
11 are located within a highly conserved block of linkage disequilibrium of at least 500 kb  
12 and likely co-segregate (2, 5).  
13  
14

15  
16  
17 According to HW equilibrium, in the group of 216 unrelated Hispanic individuals we  
18 observed a higher than expected frequency of the T<sub>-13910</sub> allele. While this could be  
19 explained by selection bias or by a higher frequency of LP in the Spanish population  
20 that founded the Chilean colony, it could also be reflective of positive selection for LP  
21 allele carriers, as has been suggested for decades (37-39). Any evolutionary advantage  
22 conferred by the T<sub>-13910</sub> allele may or may not be related to the consumption of dairy  
23 products. Indeed, it was reported that this allele confers protection not only against bone  
24 fractures (40, 41), but also colon cancer (42).  
25  
26

27  
28  
29 The validity of using LCTC>T<sub>-13910</sub> SNP genotyping for diagnosis of the LNP or LP  
30 state was evaluated in the group of 51 Chilean patients with suspected LNP. The HBT  
31 showed a high positive and negative predictive value, sensitivity and specificity  
32 compared to genetic testing (Table 2). These results are similar to those recently  
33 reported by other groups (10, 24, 34, 43) and confirm the utility of the analysis of this  
34 SNP as a clinical test for the diagnosis of LP/LNP in the adult Chilean population. Only  
35 3 patients (10.3%) with malabsorption of lactose shown by HBT, were genetically LP  
36 (LCT-13910CT genotype). It was not possible to recall these 3 patients to carry out  
37 complementary studies to rule out other causes of lactose malabsorption, such as  
38 intestinal parasitic infections like Giardiasis, seronegative celiac disease or other  
39  
40  
41  
42  
43  
44  
45  
46  
47  
48  
49  
50  
51  
52  
53  
54  
55  
56  
57  
58  
59  
60

1  
2  
3 conditions as has been shown in other recent studies (43). Interestingly, one of these  
4  
5 patients was also heterozygous at an additional SNP not previously described,  
6  
7 LCTG>A<sub>-13937</sub> (2). We do not know if this new variant can explain the phenotype-  
8  
9 genotype discordance.  
10  
11

12  
13 A recent study showed a high prevalence of celiac illness among patients with an initial  
14  
15 diagnosis of LNP, suggesting that lactose intolerance can be the first manifestation of  
16  
17 celiac illness; the authors recommend considering the existence of celiac illness in all  
18  
19 patients with LNP before recommending a lactose free diet for life (44). In our study of  
20  
21 51 patients with clinical suspicion of lactose intolerance, only one with LNP confirmed  
22  
23 by HBT and SNP genotyping had positive anti-tTG (2% of the total) suggesting the  
24  
25 coexistence of both conditions.  
26  
27

28  
29 One 16-year-old patient had negative HBT yet had the LNP genotype. It is possible that  
30  
31 this patient has not yet manifested the LNP phenotype and still maintains sufficient  
32  
33 levels of intestinal lactase to digest a 25 g load. The age at which the LNP state is  
34  
35 initiated varies among different populations and ethnic groups, starting as early as 1 to 8  
36  
37 y in black and Asian populations, and much later (20 y) in northern European  
38  
39 populations (10, 45-47). The age of initiation of the LNP state in Chilean individuals  
40  
41 remains unknown.  
42  
43

44  
45 Among the 51 Chilean patients with positive HBT and the LCT-13910CC genotype,  
46  
47 significantly more report having relatives with functional digestive disorders than their  
48  
49 HBT negative counterparts, suggesting that the condition of LNP could be in part  
50  
51 responsible for digestive symptoms. In our complete clinical, nutritional, and genetic  
52  
53 study of 112 Hispanic individuals, those with the LCT-13910CC genotype were  
54  
55 significantly more likely to self-report lactose intolerance despite very low (30 L  
56  
57 milk/person/year) consumption of dairy products. This level is well below the WHO  
58  
59  
60

1  
2  
3 recommended level of 240 L milk/person/year. Reasons for the low level of  
4  
5 consumption are likely due to multiple causes including cost, preference, and societal  
6  
7 habits which are likely influenced by the existence of a **high prevalence of LNP and**  
8  
9 **lactose intolerant state within this population.** It has been reported that the allele  
10  
11 frequencies of the LCTC>T-13910 SNP within a population correlates with the tendency  
12  
13 of that population to consume dairy products and ingest calcium (48-50). Both this  
14  
15 study and one other (51) show that the effective consumption of dairy products and  
16  
17 calcium in Chile remains below international recommendations.  
18  
19  
20  
21

22 In summary, the LNP state continues to be predominant in the Chilean population.  
23  
24 Epidemiologically, this may cause the development of digestive symptoms affecting  
25  
26 quality of life and leading to medical consultations as well as lower tendency to ingest  
27  
28 dairy products and calcium within the adult population of the contemporary Americas.  
29  
30 The fact that the LNP state is an inherited condition should be considered when  
31  
32 developing public programs that encourage consumption of dairy products, and should  
33  
34 be a stimulus for the food industry to develop new lactose-free dairy products.  
35  
36  
37  
38  
39  
40  
41  
42  
43  
44  
45  
46  
47  
48  
49  
50  
51  
52  
53  
54  
55  
56  
57  
58  
59  
60

**Table 1. Clinical and genetic characteristics of 51 Chilean patients having hydrogen breath test (HBT) for suspicion of lactose non persistence (LNP).**

|                                                               | <b>HBT Positive</b><br><b>(n = 29)</b> | <b>HBT Negative</b><br><b>(n = 22)</b> | <b><i>p</i></b> |
|---------------------------------------------------------------|----------------------------------------|----------------------------------------|-----------------|
| Female gender (%)                                             | 82.7                                   | 86.3                                   | n.s.            |
| Age (y)                                                       | 36 ± 19                                | 32 ± 12                                | n.s.            |
| Number reporting gastrointestinal symptoms after lactose load | 24 (82%)                               | 6 (27%)                                | < 0.001         |
| Number reporting family history of IBS                        | 22 (76%)                               | 8 (36%)                                | < 0.001         |
| LCT-13910 CC genotype                                         | 26 (89.6%)                             | 1 (4.5%)                               | < 0.001         |
| LCT-13910 CT/TT genotype                                      | 3 (10.3%)                              | 21(95.5%)                              | < 0.001         |

IBS, irritable bowel syndrome.

**Table 2. Correlation of the HBT in comparison to LCT C>T.<sub>13910</sub> genotype in 51 Chilean patients.**

|                           |       |
|---------------------------|-------|
| Sensitivity               | 96.3% |
| Specificity               | 87.5% |
| Predictive value positive | 89.7% |
| Predictive value negative | 95.5% |
| LHR positive              | 7.7   |
| LHR negative              | 0.04  |

LHR, likelihood ratio



**Table 3. General characteristics, self reported gastrointestinal symptoms related to dairy ingestion and LCTC>T<sub>-13910</sub> SNP genotype and allele frequencies in a population of Hispanic and Amerindian individuals.**

|                                           | <b>Hispanics</b><br>n = 216 | <b>Amerindians</b><br>n = 43 | <i>P</i>         |
|-------------------------------------------|-----------------------------|------------------------------|------------------|
| Women (%)                                 | 46                          | 65                           | 0.02             |
| Age (y)                                   | 50 ± 12                     | 54 ± 15                      | n.s.             |
| Number self reporting lactose intolerance | 44 (20.4%)                  | 19 (44.1%)                   | 0.001            |
| <b>Number reporting diarrhea</b>          | <b>15 (7%)</b>              | <b>16 (37.2%)</b>            | <b>&lt;0.001</b> |
| Number reporting bloating                 | 77 (35.6%)                  | 14 (32.5%)                   | n.s.             |
| LCT-13910 CC genotype                     | 123 (56.9%)                 | 38 (88.3%)                   | < 0.001          |
| LCT-13910 CT genotype                     | 90 (41.7%)                  | 5 (11.7%)                    | < 0.001          |
| LCT-13910 TT genotype                     | 3 (1.4%)                    | 0                            | n.s.             |
| C allele frequency                        | 77.7%                       | 94.2%                        | < 0.001          |
| T allele frequency                        | 22.3%                       | 5.8%                         | < 0.001          |

n.s., not significant

1  
2  
3 **Author's contribution:** Study concept and design (JFM); acquisition of data (JFM,  
4 EM, LA, XM and CP); analysis and interpretation of data (JFM, EM, JCh); drafting of  
5 the manuscript (JFM, EM, XM, CP); critical revision of the manuscript for important  
6 intellectual content (JCh); statistical analysis (JFM, EM, XM, CP); obtained funding  
7 (JFM, JCh); final revision and edition (JFM, CP, XM).

8  
9  
10  
11  
12  
13  
14  
15  
16 **Acknowledgments:** The authors acknowledge the Alexander von Humboldt  
17 Foundation (Germany) for donating the NanoDrop ND-1000 Spectrophotometer used  
18 for DNA analysis and quantification. The authors thank Dr. Flavio Nervi for providing  
19 access to the database and DNA bank of the Hispanic and Mapuche populations, and  
20 Dr. Julieta Klassen for collaboration in the analysis of dairy product ingestion. This  
21 study was partially supported grants of the National Commission of Scientific and  
22 Technological Research (CONICYT), FONDECYT N°1080325 to JFM, and from the  
23 Office of Research affairs of the Pontificia Universidad Catolica de Chile, School of  
24 Medicine to EM.

25  
26  
27  
28  
29  
30  
31  
32  
33  
34  
35  
36  
37  
38  
39  
40  
41 **Competing Interest:** We declare no conflicts of interest.

#### 42 43 44 45 **License for Publication:**

46  
47  
48 The Corresponding Author has the right to grant on behalf of all authors and does grant  
49 on behalf of all authors, an exclusive license (or non exclusive for government  
50 employees) on a worldwide basis to the BMJ Publishing Group Ltd and its Licensees to  
51 permit this article (if accepted) to be published in BMJ Open editions and any other  
52 BMJ PGL products to exploit all subsidiary rights, as set out in our license.

## REFERENCES

1. Enattah N, Pekkarinen T, Valimaki MJ, Loyttyneimi E, Jarvela I. Genetically defined adult-type hypolactasia and self-reported lactose intolerance as risk factors of osteoporosis in Finnish postmenopausal women. *Eur J Clin Nutr* 2005;59:1105-1111.
2. Ingram CJ, Mulcare CA, Itan Y, Thomas MG, Swallow DM. Lactose digestion and the evolutionary genetics of lactase persistence. *Hum Genet* 2009;124:579-591.
3. Lomer MC, Parkes GC, Sanderson JD. Review article: lactose intolerance in clinical practice--myths and realities. *Aliment Pharmacol Ther* 2008;27:93-103.
4. Matthews SB, Waud JP, Roberts AG, Campbell AK. Systemic lactose intolerance: a new perspective on an old problem. *Postgrad Med J* 2005;81:167-173.
5. Bersaglieri T, Sabeti PC, Patterson N, Vanderploeg T, Schaffner SF, Drake JA, Rhodes M, et al. Genetic signatures of strong recent positive selection at the lactase gene. *Am J Hum Genet* 2004;74:1111-1120.
6. Enattah NS, Sahi T, Savilahti E, Terwilliger JD, Peltonen L, Jarvela I. Identification of a variant associated with adult-type hypolactasia. *Nat Genet* 2002;30:233-237.
7. Tishkoff SA, Reed FA, Ranciaro A, Voight BF, Babbitt CC, Silverman JS, Powell K, et al. Convergent adaptation of human lactase persistence in Africa and Europe. *Nat Genet* 2007;39:31-40.
8. Kuokkanen M, Enattah NS, Oksanen A, Savilahti E, Orpana A, Jarvela I. Transcriptional regulation of the lactase-phlorizin hydrolase gene by polymorphisms associated with adult-type hypolactasia. *Gut* 2003;52:647-652.

- 1  
2  
3 9. Lewinsky RH, Jensen TG, Moller J, Stensballe A, Olsen J, Troelsen JT. T-13910  
4 DNA variant associated with lactase persistence interacts with Oct-1 and stimulates  
5 lactase promoter activity in vitro. *Hum Mol Genet* 2005;14:3945-3953.  
6  
7
- 8  
9  
10 10. Rasinpera H, Savilahti E, Enattah NS, Kuokkanen M, Totterman N, Lindahl H,  
11 Jarvela I, et al. A genetic test which can be used to diagnose adult-type hypolactasia in  
12 children. *Gut* 2004;53:1571-1576.  
13  
14
- 15  
16  
17 11. Shaw AD, Davies GJ. Lactose intolerance: problems in diagnosis and treatment.  
18 *J Clin Gastroenterol* 1999;28:208-216.  
19  
20
- 21  
22 12. Parker TJ, Woolner JT, Prevost AT, Tuffnell Q, Shorthouse M, Hunter JO.  
23 Irritable bowel syndrome: is the search for lactose intolerance justified? *Eur J*  
24 *Gastroenterol Hepatol* 2001;13:219-225.  
25  
26
- 27  
28  
29 13. Vesa TH, Seppo LM, Marteau PR, Sahi T, Korpela R. Role of irritable bowel  
30 syndrome in subjective lactose intolerance. *Am J Clin Nutr* 1998;67:710-715.  
31  
32
- 33  
34 14. Bode S, Gudmand-Hoyer E. Incidence and clinical significance of lactose  
35 malabsorption in adult coeliac disease. *Scand J Gastroenterol* 1988;23:484-488.  
36  
37
- 38  
39 15. Srinivasan U, Jones E, Weir DG, Feighery C. Lactase enzyme, detected  
40 immunohistochemically, is lost in active celiac disease, but unaffected by oats  
41 challenge. *Am J Gastroenterol* 1999;94:2936-2941.  
42  
43
- 44  
45 16. Barr RG, Levine MD, Watkins JB. Recurrent abdominal pain of childhood due  
46 to lactose intolerance. *N Engl J Med* 1979;300:1449-1452.  
47  
48
- 49  
50 17. Peuhkuri K, Poussa T, Korpela R. Comparison of a portable breath hydrogen  
51 analyser (Micro H2) with a Quintron MicroLyzer in measuring lactose maldigestion,  
52 and the evaluation of a Micro H2 for diagnosing hypolactasia. *Scand J Clin Lab Invest*  
53 1998;58:217-224.  
54  
55  
56  
57  
58  
59  
60

- 1  
2  
3  
4  
5  
6  
7  
8  
9  
10  
11  
12  
13  
14  
15  
16  
17  
18  
19  
20  
21  
22  
23  
24  
25  
26  
27  
28  
29  
30  
31  
32  
33  
34  
35  
36  
37  
38  
39  
40  
41  
42  
43  
44  
45  
46  
47  
48  
49  
50  
51  
52  
53  
54  
55  
56  
57  
58  
59  
60
18. Rosado JL, Solomons NW. Sensitivity and specificity of the hydrogen breath-analysis test for detecting malabsorption of physiological doses of lactose. *Clin Chem* 1983;29:545-548.
  19. Barillas-Mury C, Solomons NW. Test-retest reproducibility of hydrogen breath test for lactose maldigestion in preschool children. *J Pediatr Gastroenterol Nutr* 1987;6:281-285.
  20. Arola H, Koivula T, Jokela H, Jauhiainen M, Keyrilainen O, Ahola T, Uusitalo A, et al. Comparison of indirect diagnostic methods for hypolactasia. *Scand J Gastroenterol* 1988;23:351-357.
  21. Jarvela IE. Molecular diagnosis of adult-type hypolactasia (lactase non-persistence). *Scand J Clin Lab Invest* 2005;65:535-539.
  22. Bodlaj G, Stocher M, Hufnagl P, Hubmann R, Biesenbach G, Stekel H, Berg J. Genotyping of the lactase-phlorizin hydrolase -13910 polymorphism by LightCycler PCR and implications for the diagnosis of lactose intolerance. *Clin Chem* 2006;52:148-151.
  23. Enattah NS, Kuokkanen M, Forsblom C, Natah S, Oksanen A, Jarvela I, Peltonen L, et al. Correlation of intestinal disaccharidase activities with the C/T-13910 variant and age. *World J Gastroenterol* 2007;13:3508-3512.
  24. Schirru E, Corona V, Usai-Satta P, Scarpa M, Oppia F, Loriga F, Cucca F, et al. Genetic testing improves the diagnosis of adult type hypolactasia in the Mediterranean population of Sardinia. *Eur J Clin Nutr* 2007;61:1220-1225.
  25. Satta PU, Congia M, Schirru E, Scarpa M, Mura G. Genetic testing is ready to change the diagnostic scenario of lactose malabsorption. *Gut* 2008;57:137-138; author reply 138.

- 1  
2  
3  
4  
5  
6  
7  
8  
9  
10  
11  
12  
13  
14  
15  
16  
17  
18  
19  
20  
21  
22  
23  
24  
25  
26  
27  
28  
29  
30  
31  
32  
33  
34  
35  
36  
37  
38  
39  
40  
41  
42  
43  
44  
45  
46  
47  
48  
49  
50  
51  
52  
53  
54  
55  
56  
57  
58  
59  
60
26. Lacassie Y, Weinberg R, Monckeberg F. Poor predictability of lactose malabsorption from clinical symptoms for Chilean populations. *Am J Clin Nutr* 1978;31:799-804.
27. Rana S, Bhasin DK, Gupta D, Mehta SK. Assessment of optimal dose of lactose for lactose hydrogen breath test in Indian adults. *Indian J Gastroenterol* 1995;14:13-14.
28. Miquel JF, Covarrubias C, Villaroel L, Mingrone G, Greco AV, Puglielli L, Carvallo P, et al. Genetic epidemiology of cholesterol cholelithiasis among Chilean Hispanics, Amerindians, and Maoris. *Gastroenterology* 1998;115:937-946.
29. Nervi F, Miquel JF, Alvarez M, Ferreccio C, Garcia-Zattera MJ, Gonzalez R, Perez-Ayuso RM, et al. Gallbladder disease is associated with insulin resistance in a high risk Hispanic population. *J Hepatol* 2006;45:299-305.
30. Merriwether DA, Rothhammer F, Ferrell RE. Distribution of the four founding lineage haplotypes in Native Americans suggests a single wave of migration for the New World. *Am J Phys Anthropol* 1995;98:411-430.
31. Moraga ML, Rocco P, Miquel JF, Nervi F, Llop E, Chakraborty R, Rothhammer F, et al. Mitochondrial DNA polymorphisms in Chilean aboriginal populations: implications for the peopling of the southern cone of the continent. *Am J Phys Anthropol* 2000;113:19-29.
32. Rocco P, Morales C, Moraga M, Miquel JF, Nervi F, Llop E, Carvallo P, et al. [Genetic composition of the Chilean population. Analysis of mitochondrial DNA polymorphism]. *Rev Med Chil* 2002;130:125-131.
33. Cuevas A, Miquel JF, Reyes MS, Zanlungo S, Nervi F. Diet as a risk factor for cholesterol gallstone disease. *J Am Coll Nutr* 2004;23:187-196.

- 1  
2  
3 34. Buning C, Genschel J, Jurga J, Fiedler T, Voderholzer W, Fiedler EM, Worm M,  
4  
5 et al. Introducing genetic testing for adult-type hypolactasia. *Digestion* 2005;71:245-  
6  
7 250.  
8  
9  
10 35. Almon R, Engfeldt P, Tysk C, Sjostrom M, Nilsson TK. Prevalence and trends  
11  
12 in adult-type hypolactasia in different age cohorts in Central Sweden diagnosed by  
13  
14 genotyping for the adult-type hypolactasia-linked LCT -13910C > T mutation. *Scand J*  
15  
16 *Gastroenterol* 2007;42:165-170.  
17  
18  
19 36. Bulhoes AC, Goldani HA, Oliveira FS, Matte US, Mazzuca RB, Silveira TR.  
20  
21 Correlation between lactose absorption and the C/T-13910 and G/A-22018 mutations of  
22  
23 the lactase-phlorizin hydrolase (LCT) gene in adult-type hypolactasia. *Braz J Med Biol*  
24  
25 *Res* 2007;40:1441-1446.  
26  
27  
28 37. Cook GC, al-Torki MT. High intestinal lactase concentrations in adult Arabs in  
29  
30 Saudi Arabia. *Br Med J* 1975;3:135-136.  
31  
32  
33 38. Charney M, McCracken RD. Intestinal lactase deficiency in adult nonhuman  
34  
35 primates: implications for selection pressures in man. *Soc Biol* 1971;18:416-421.  
36  
37  
38 39. Simoons FJ. Primary adult lactose intolerance and the milking habit: a problem  
39  
40 in biologic and cultural interrelations. II. A culture historical hypothesis. *Am J Dig Dis*  
41  
42 1970;15:695-710.  
43  
44  
45 40. Enattah NS, Sulkava R, Halonen P, Kontula K, Jarvela I. Genetic variant of  
46  
47 lactase-persistent C/T-13910 is associated with bone fractures in very old age. *J Am*  
48  
49 *Geriatr Soc* 2005;53:79-82.  
50  
51  
52 41. Obermayer-Pietsch BM, Gugatschka M, Reitter S, Plank W, Strele A, Walter D,  
53  
54 Bonelli C, et al. Adult-type hypolactasia and calcium availability: decreased calcium  
55  
56 intake or impaired calcium absorption? *Osteoporos Int* 2007;18:445-451.  
57  
58  
59  
60

- 1  
2  
3  
4  
5  
6  
7  
8  
9  
10  
11  
12  
13  
14  
15  
16  
17  
18  
19  
20  
21  
22  
23  
24  
25  
26  
27  
28  
29  
30  
31  
32  
33  
34  
35  
36  
37  
38  
39  
40  
41  
42  
43  
44  
45  
46  
47  
48  
49  
50  
51  
52  
53  
54  
55  
56  
57  
58  
59  
60
42. Rasinpera H, Forsblom C, Enattah NS, Halonen P, Salo K, Victorzon M, Mecklin JP, et al. The C/C-13910 genotype of adult-type hypolactasia is associated with an increased risk of colorectal cancer in the Finnish population. *Gut* 2005;54:643-647.
43. Krawczyk M, Wolska M, Schwartz S, Gruenhagen F, Terjung B, Portincasa P, Sauerbruch T, et al. Concordance of genetic and breath tests for lactose intolerance in a tertiary referral centre. *J Gastrointest Liver Dis* 2008;17:135-139.
44. Ojetti V, Nucera G, Migneco A, Gabrielli M, Lauritano C, Danese S, Zocco MA, et al. High prevalence of celiac disease in patients with lactose intolerance. *Digestion* 2005;71:106-110.
45. Sahi T, Isokoski M, Jussila J, Launiala K. Lactose malabsorption in Finnish children of school age. *Acta Paediatr Scand* 1972;61:11-16.
46. Simoons FJ. Age of onset of lactose malabsorption. *Pediatrics* 1980;66:646-648.
47. Wang Y, Harvey CB, Hollox EJ, Phillips AD, Poulter M, Clay P, Walker-Smith JA, et al. The genetically programmed down-regulation of lactase in children. *Gastroenterology* 1998;114:1230-1236.
48. Laaksonen MM, Mikkila V, Rasanen L, Rontu R, Lehtimaki TJ, Viikari JS, Raitakari OT. Genetic lactase non-persistence, consumption of milk products and intakes of milk nutrients in Finns from childhood to young adulthood. *Br J Nutr* 2009;110:106-110.
49. Torniaainen S, Hedelin M, Autio V, Rasinpera H, Balter KA, Klint A, Bellocco R, et al. Lactase persistence, dietary intake of milk, and the risk for prostate cancer in Sweden and Finland. *Cancer Epidemiol Biomarkers Prev* 2007;16:956-961.
50. Lehtimaki T, Hemminki J, Rontu R, Mikkila V, Rasanen L, Laaksonen M, Hutri-Kahonen N, et al. The effects of adult-type hypolactasia on body height growth



1  
2  
3 and dietary calcium intake from childhood into young adulthood: a 21-year follow-up  
4 study--the Cardiovascular Risk in Young Finns Study. *Pediatrics* 2006;118:1553-1559.  
5  
6

7  
8 51. Castillo C, Atalah E, Benavides X, Urteaga C. [Food patterns among adults  
9 visiting primary care clinics in the metropolitan region]. *Rev Med Chil* 1997;125:283-  
10 289.  
11  
12  
13  
14  
15  
16  
17  
18  
19  
20  
21  
22  
23  
24  
25  
26  
27  
28  
29  
30  
31  
32  
33  
34  
35  
36  
37  
38  
39  
40  
41  
42  
43  
44  
45  
46  
47  
48  
49  
50  
51  
52  
53  
54  
55  
56  
57  
58  
59  
60

For peer review only

## FIGURE LEGENDS

**Figure 1.** RFLP and sequence analysis of a 448 bp region of MCM6 intron 13 containing the LCTC>T<sub>-13910</sub> SNP. Upper panel: RFLP analysis of the 448 bp amplicon digested with BsmFI. Left lane, 50-bp DNA ladder. Right lane, undigested PCR amplicon. Center lanes, digested products from representative individuals having the three different SNP genotypes. The ancestral LCT-13910CC genotype results in two bands of 350 bp and 110 bp; LCT-13910CT genotype results in three bands of 350 bp, 240 bp and 110 bp; LCT-13910TT genotype results in two bands of 240 bp and 110 bp. Lower panel: Representative sequence tracings showing confirmation of RFLP data. Direct sequence analysis was performed on 35 of the 51 samples.

**Figure 2.** De Finetti diagram for the LCTC>T<sub>-13910</sub> SNP in Hispanic (black dotted line) and Amerindian (blue dotted line) populations. The diagram shows genotype and allele frequencies. The frequencies of homozygous genotypes are plotted on the left and right diagonal axes, the frequencies of heterozygous genotypes are plotted on the vertical axis, and the allele frequencies are depicted by the interaction of the vertical dotted lines with the bottom perpendicular (allele 1 = C<sub>-13910</sub>). The genotype frequencies plot on the parabola in the diagram, indicating that Amerindians are, but Hispanics are not, in Hardy-Weinberg equilibrium (Hardy-Weinberg parabola). The diagram was plotted using the software package developed by T.M. Strom and T.F. Wienker (<http://ihg.gsf.de/cgi-bin/hw/hwal.pl>).

STROBE Statement—Checklist of items that should be included in reports of *case-control studies*

| Section/Topic            | Item # | Recommendation                                                                                                                                                                       | Reported on page # |
|--------------------------|--------|--------------------------------------------------------------------------------------------------------------------------------------------------------------------------------------|--------------------|
| Title and abstract       | 1      | (a) Indicate the study's design with a commonly used term in the title or the abstract                                                                                               | 2                  |
|                          |        | (b) Provide in the abstract an informative and balanced summary of what was done and what was found                                                                                  | 2                  |
| <b>Introduction</b>      |        |                                                                                                                                                                                      |                    |
| Background/rationale     | 2      | Explain the scientific background and rationale for the investigation being reported                                                                                                 | 6                  |
| Objectives               | 3      | State specific objectives, including any prespecified hypotheses                                                                                                                     | 7                  |
| <b>Methods</b>           |        |                                                                                                                                                                                      |                    |
| Study design             | 4      | Present key elements of study design early in the paper                                                                                                                              | 9                  |
| Setting                  | 5      | Describe the setting, locations, and relevant dates, including periods of recruitment, exposure, follow-up, and data collection                                                      | 9                  |
| Participants             | 6      | (a) Give the eligibility criteria, and the sources and methods of case ascertainment and control selection. Give the rationale for the choice of cases and controls                  | 9-10               |
|                          |        | (b) For matched studies, give matching criteria and the number of controls per case                                                                                                  |                    |
| Variables                | 7      | Clearly define all outcomes, exposures, predictors, potential confounders, and effect modifiers. Give diagnostic criteria, if applicable                                             | 9-10               |
| Data sources/measurement | 8*     | For each variable of interest, give sources of data and details of methods of assessment (measurement). Describe comparability of assessment methods if there is more than one group | 9-10               |
| Bias                     | 9      | Describe any efforts to address potential sources of bias                                                                                                                            | 4                  |
| Study size               | 10     | Explain how the study size was arrived at                                                                                                                                            | 9                  |
| Quantitative variables   | 11     | Explain how quantitative variables were handled in the analyses. If applicable, describe which groupings were chosen and why                                                         | 10                 |

|                     |     |                                                                                                                                                                                                              |       |
|---------------------|-----|--------------------------------------------------------------------------------------------------------------------------------------------------------------------------------------------------------------|-------|
| Statistical methods | 12  | (a) Describe all statistical methods, including those used to control for confounding                                                                                                                        | 10    |
|                     |     | (b) Describe any methods used to examine subgroups and interactions                                                                                                                                          | n.a.  |
|                     |     | (c) Explain how missing data were addressed                                                                                                                                                                  | n.a.  |
|                     |     | (d) If applicable, explain how matching of cases and controls was addressed                                                                                                                                  | n.a.  |
|                     |     | (e) Describe any sensitivity analyses                                                                                                                                                                        | n.a.  |
| <b>Results</b>      |     |                                                                                                                                                                                                              |       |
| Participants        | 13* | (a) Report numbers of individuals at each stage of study—eg numbers potentially eligible, examined for eligibility, confirmed eligible, included in the study, completing follow-up, and analyzed            | n.a.  |
|                     |     | (b) Give reasons for non-participation at each stage                                                                                                                                                         | n.a.  |
|                     |     | (c) Consider use of a flow diagram                                                                                                                                                                           | n.a.  |
| Descriptive data    | 14* | (a) Give characteristics of study participants (eg demographic, clinical, social) and information on exposures and potential confounders                                                                     | 12,26 |
|                     |     | (b) Indicate number of participants with missing data for each variable of interest                                                                                                                          | n.a.  |
| Outcome data        | 15* | Report numbers in each exposure category, or summary measures of exposure                                                                                                                                    | 13,28 |
| Main results        | 16  | (a) Give unadjusted estimates and, if applicable, confounder-adjusted estimates and their precision (eg, 95% confidence interval). Make clear which confounders were adjusted for and why they were included | n.a.  |
|                     |     | (b) Report category boundaries when continuous variables were categorized                                                                                                                                    | n.a.  |
|                     |     | (c) If relevant, consider translating estimates of relative risk into absolute risk for a meaningful time period                                                                                             | n.a.  |
| Other analyses      | 17  | Report other analyses done—eg analyses of subgroups and interactions, and sensitivity analyses                                                                                                               | n.a.  |
| <b>Discussion</b>   |     |                                                                                                                                                                                                              |       |
| Key results         | 18  | Summarize key results with reference to study objectives                                                                                                                                                     | 16,17 |
| Limitations         | 19  | Discuss limitations of the study, taking into account sources of                                                                                                                                             | 16    |

|                          |    |                                                                                                                                                                            |       |
|--------------------------|----|----------------------------------------------------------------------------------------------------------------------------------------------------------------------------|-------|
|                          |    | potential bias or imprecision.<br><br>Discuss both direction and magnitude of any potential bias                                                                           |       |
| Interpretation           | 20 | Give a cautious overall interpretation of results considering objectives, limitations, multiplicity of analyses, results from similar studies, and other relevant evidence | 17,18 |
| Generalisability         | 21 | Discuss the generalisability (external validity) of the study results                                                                                                      | 18    |
| <b>Other information</b> |    |                                                                                                                                                                            |       |
| Funding                  | 22 | Give the source of funding and the role of the funders for the present study and, if applicable, for the original study on which the present article is based              | 18    |

\*Give information separately for cases and controls in case-control studies and, if applicable, for exposed and unexposed groups in cohort and cross-sectional studies.

**Note:** An Explanation and Elaboration article discusses each checklist item and gives methodological background and published examples of transparent reporting. The STROBE checklist is best used in conjunction with this article (freely available on the Web sites of PLoS Medicine at <http://www.plosmedicine.org/>, Annals of Internal Medicine at <http://www.annals.org/>, and Epidemiology at <http://www.epidem.com/>). Information on the STROBE Initiative is available at [www.strobe-statement.org](http://www.strobe-statement.org).

Figure 1

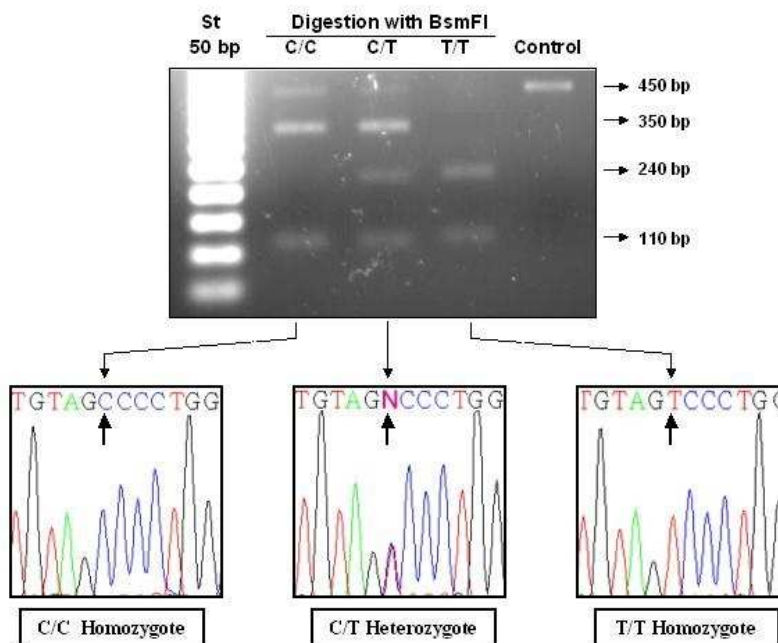

Figure 1. RFLP and sequence analysis of a 448 bp region of MCM6 intron 13 containing the LCTC>T-13910 SNP. Upper panel: RFLP analysis of the 448 bp amplicon digested with BsmFI. Left lane, 50-bp DNA ladder. Right lane, undigested PCR amplicon. Center lanes, digested products from representative individuals having the three different SNP genotypes. The ancestral LCT-13910CC genotype results in two bands of 350 bp and 110 bp; LCT-13910CT genotype results in three bands of 350 bp, 240 bp and 110 bp; LCT-13910TT genotype results in two bands of 240 bp and 110 bp. Lower panel: Representative sequence tracings showing confirmation of RFLP data. Direct sequence analysis was performed on 35 of the 51 samples.  
254x190mm (72 x 72 DPI)

Figure 2

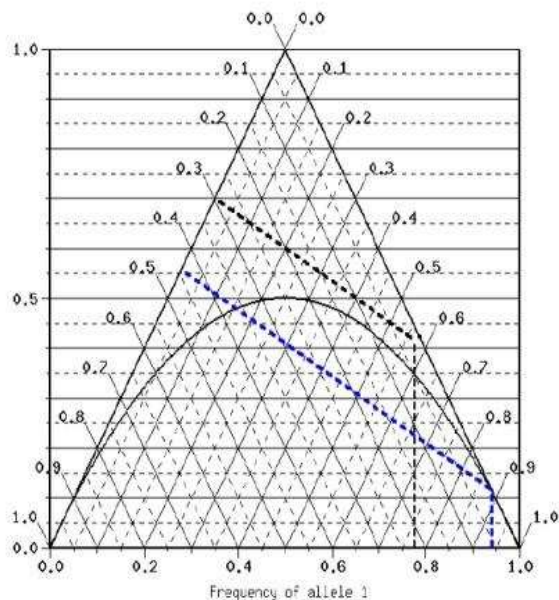

Figure 2. De Finetti diagram for the LCTC>T-13910 SNP in Hispanic (black dotted line) and Amerindian (blue dotted line) populations. The diagram shows genotype and allele frequencies. The frequencies of homozygous genotypes are plotted on the left and right diagonal axes, the frequencies of heterozygous genotypes are plotted on the vertical axis, and the allele frequencies are depicted by the interaction of the vertical dotted lines with the bottom perpendicular (allele 1 = C-13910). The genotype frequencies plot on the parabola in the diagram, indicating that Amerindians are, but Hispanics are not, in Hardy-Weinberg equilibrium (Hardy-Weinberg parabola). The diagram was plotted using the software package developed by T.M. Strom and T.F. Wienker (<http://ihg.gsf.de/cgi-bin/hw/hwal.pl>).

254x190mm (72 x 72 DPI)

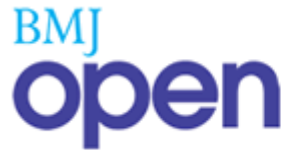

**The European lactase persistence genotype determines lactase persistence state and correlates with gastrointestinal symptoms in the Hispanic and Amerindian Chilean population: a case-control and population-based study.**

|                               |                                                                                                                                                                                                                                                                                                                                                                                                                                                                              |
|-------------------------------|------------------------------------------------------------------------------------------------------------------------------------------------------------------------------------------------------------------------------------------------------------------------------------------------------------------------------------------------------------------------------------------------------------------------------------------------------------------------------|
| Journal:                      | <i>BMJ Open</i>                                                                                                                                                                                                                                                                                                                                                                                                                                                              |
| Manuscript ID:                | bmjopen-2011-000125.R2                                                                                                                                                                                                                                                                                                                                                                                                                                                       |
| Article Type:                 | Research                                                                                                                                                                                                                                                                                                                                                                                                                                                                     |
| Date Submitted by the Author: | 26-May-2011                                                                                                                                                                                                                                                                                                                                                                                                                                                                  |
| Complete List of Authors:     | Morales, Eugenia; Pontificia Universidad Catolica de Chile, Gastroenterology<br>Azocar, Lorena; Pontificia Universidad Catolica de Chile, Gastroenterology<br>Maul, Ximena; Pontificia Universidad Catolica de Chile, Medical student<br>Perez, Claudio; Pontificia Universidad Catolica de Chile, Medical student<br>Chianale, Jose; Pontificia Universidad Catolica de Chile, Gastroenterology<br>Miquel, Juan; Pontificia Universidad Catolica de Chile, Gastroenterology |
| <b>Subject Heading</b>:       | Gastroenterology                                                                                                                                                                                                                                                                                                                                                                                                                                                             |
| Keywords:                     | lactose intolerance, lactase persistence state, -13910T variant, IBS                                                                                                                                                                                                                                                                                                                                                                                                         |
|                               |                                                                                                                                                                                                                                                                                                                                                                                                                                                                              |

SCHOLARONE™  
Manuscripts



1  
2  
3 **The European lactase persistence genotype determines lactase persistence state**  
4 **and correlates with gastrointestinal symptoms in the Hispanic and Amerindian**  
5 **Chilean population: a case-control and population-based study.**  
6  
7  
8  
9

10  
11  
12 Eugenia Morales<sup>1</sup>, Lorena Azocar<sup>1</sup>, Ximena Maul<sup>2</sup>, Claudio Perez<sup>2</sup>, José Chianale<sup>1</sup>,  
13  
14 Juan Francisco Miquel<sup>1\*</sup>.  
15  
16

17  
18  
19 Department of Gastroenterology<sup>1</sup>, Medical Students<sup>2</sup>, Faculty of Medicine, Pontificia  
20  
21 Universidad Católica de Chile.  
22  
23

24  
25 **Keywords:** lactose intolerance, lactase persistence state, -13910T variant, IBS.  
26  
27

28  
29 **\*Correspondence:**  
30  
31

32 Juan Francisco Miquel, MD  
33

34  
35 Marcoleta 367, Santiago  
36

37  
38 Telephone: 56 2 3543830  
39

40  
41 Fax: 56 2 6397780  
42

43  
44 e-mail: jfmiquel@med.puc.cl  
45  
46  
47  
48  
49

50 **Word count: 3,359**  
51  
52

53  
54 **List of abbreviations:** LP, lactase persistent state; LNP, lactase non-persistent state;  
55  
56 LCT, lactase-phlorizin hydrolase; HBT, hydrogen breath test; SNP, single nucleotide  
57  
58 polymorphism.  
59  
60

## Abstract

**Background:** The lactase persistent (LP) or lactase non persistent (LNP) state in European adults is genetically determined by a single nucleotide polymorphism (SNP) located 13.9 kb upstream of the lactase (LCT) gene, known as LCT C>T<sub>-13910</sub> (rs4988235). The LNP condition causes an inability to digest the milk sugar lactose leading to gastrointestinal symptoms and can affect nutrient and calcium intake in certain populations. **Objectives:** We studied a group of 51 Chilean patients to assess whether this SNP influences the LP/LNP state in this population, and determined the prevalence of LCT C>T<sub>-13910</sub> genotypes in a representative sample of 216 Hispanics and 43 Amerindians with correlation to digestive symptoms. **Design:** Case-Control study done in Chilean patients with clinical suspicion of LNP that were assessed using clinical survey, hydrogen breath test (HBT), and SNP genotyping. The population sample of Hispanics and Amerindians was assessed by clinical survey and SNP genotyping. **Results:** Of the 51 patients with clinical suspicion of LNP, 29 were HBT positive. The CC genotype (LNP) was present in 89.7% of the patients with positive HBT and in only 4.7% of those with negative HBT. The prevalence of the CC genotype was 56.9% in the Hispanic population and 88.3% in Amerindians and was associated with a higher self reported clinical intolerance to dairies ingestion. **Conclusion:** The LP/LNP state is determined by the LCT C>T<sub>-13910</sub> variant in Chileans. This variant predicts digestive symptoms associated with the ingestion of lactose and is a good tool for the diagnosis of primary adult hypolactasia. The LCT T<sub>-13910</sub> allele is rare in the Amerindian population and is suggestive of European ancestry in this contemporary population.

## ARTICLE SUMMARY

**Article focus:** The aims of the present study were three questions; 1) If the European variant C/T-13910 determined lactose-persistent and lactose non-persistent state in adult Chilean Hispanic and Amerindian population; 2) If there is a correlation between the C/T-13910 genotyping and the hydrogen breath test (HBT) for diagnosis of LNP in our population; 3) To determine for the first time in an Latin American population the prevalence of the lactose non-persistence genotype (CC) and its correlation with digestive symptoms and ingestion of dairy products.

**Significance of the study:** The three key messages of the present study were: 1) We demonstrate for the first time that the European lactase persistence -13910T variant determines lactase persistence in the Chilean Hispanic and Amerindian population. 2) We demonstrate a strong correlation between the C-13910>T genotype with the hydrogen breath test and lactose tolerance in a group of patients with clinical suspicion of lactose intolerance. 3) In a representative sample of the Hispanic Chilean population (Mestizos) and in Amerindians, we observed a high prevalence of the lactose non-persistence genotype (CC) with a clear gradient between ethnic groups (56% and 88%, respectively). Interestingly, C-13910>T genotype was significantly associated with digestive symptoms and self reporting intolerance to dairy ingestion. This could explain the observed low consumption of dairy products (30 L milk/person/year) in our population.

### Strengths and limitations of the study:

- Our strengths:

- This is the first study in Latin America that assesses if the European lactase persistence -13910T variant determines lactase persistence in the Chilean Hispanic and Amerindian general population.
- Our results may be of clinical and epidemiological relevance, not only for the Chilean population, but also for other Hispanic and Amerindian populations of the Americas with similar genetic background. The fact that the LNP state is an inherited frequent condition in Mestizo and Amerindians should be considered when developing public programs that encourage consumption of dairy products, and should be a stimulus for the food industry to develop new and high quality lactose-free dairy products in these regions.
- We randomly selected a representative sample of the Hispanic Chilean population (n=216) and Amerindians (n=43), and performed the genotyping of LCT C>T<sub>-13910</sub>. We observed a high prevalence of the lactose non-persistence genotype (CC) with a clear gradient between both ethnic groups (56% and 88%, respectively), that correlates with digestive symptoms and self reporting intolerance to dairy ingestion.

**- Our limitations:**

- Non randomized recruitment of the 51 patients with suspicion of lactose intolerance could induce selection bias.
- A small number of patients with suspicion of lactose intolerance (n= 51).

- Semi-quantitative food frequency questionnaire with a 24 h dietary recall obtained in a subgroup of the Hispanics and performed years before the genetic analysis.

For peer review only

1  
2  
3  
4  
5  
6  
7  
8  
9  
10  
11  
12  
13  
14  
15  
16  
17  
18  
19  
20  
21  
22  
23  
24  
25  
26  
27  
28  
29  
30  
31  
32  
33  
34  
35  
36  
37  
38  
39  
40  
41  
42  
43  
44  
45  
46  
47  
48  
49  
50  
51  
52  
53  
54  
55  
56  
57  
58  
59  
60

## INTRODUCTION

Lactose, the main sugar in milk, must be hydrolyzed by lactase-phlorizin hydrolase into glucose and galactose for absorption. Intestinal activity of the lactase enzyme (LCT) (MIM 603202) decreases in all mammals after weaning, resulting in poor lactose absorption[1]. In humans this condition is termed “lactase non-persistence” (LNP), “adult type hypolactasia” (MIM 223100) and is estimated to occur in approximately 65% of the contemporary world population[2, 3]. LNP can generate intolerance to the ingestion of dairies with the development of abdominal and systemic symptoms that lead to medical consultations and evaluations. In contrast, lactase persistent (LP) individuals remain tolerant of lactose and maintain high levels of LCT expression throughout adult life[4]. The prevalence of the LP phenotype, which is an autosomal dominant condition (MIM 223100) is reported to vary between 0 and 95% in different populations[3], but is unknown in contemporary Latin American populations [2, 5].

The recent discovery of single nucleotide polymorphisms (SNPs) that determine the LP state in humans, both in Europe[6] and among some pastoral populations in Africa, has generated growing interest in the study of this condition[2, 7]. The appearance of these SNPs seems to have occurred on more than one occasion in human evolution between 1,500 and 12,000 y ago in northern Europe and among some nomadic populations of Asia and Africa[7]. The SNP known as LCT C>T<sub>-13910</sub> (rs4988235) is located 13.9 kb upstream of the LCT gene in the 13<sup>th</sup> intron of an adjacent gene (MCM6). The T allele of this SNP correlates with the LP state in European populations[6], and individuals with this allele have higher levels of LCT transcripts in enterocytes compared to individuals who carry the C allele[8]. *In vitro* studies show that cells transfected with the LCT T<sub>-13910</sub> variant show increased activity

1  
2  
3 of the LCT promoter[9]. Another SNP known as LCT G>A<sub>22018</sub>, shows some  
4  
5 association with the LP/LNP phenotype, and while it does not appear to be the causal  
6  
7 variant, it is present in a block of linkage disequilibrium with little evidence of  
8  
9 recombination in this region of the genome[5, 10].  
10  
11

12  
13 In clinical practice, the LNP state is relevant because it can generate  
14  
15 malabsorption and intolerance of lactose, with the development of clinical symptoms  
16  
17 such as abdominal pain and distension, diarrhea, bloating, nausea, and vomiting[3]. A  
18  
19 significant percentage of patients do not relate these symptoms to dairies ingestion[11],  
20  
21 and the recurring nature of the symptoms can lead to misdiagnosis of chronic diarrhea,  
22  
23 irritable bowel syndrome, celiac illness, or other clinical conditions[12, 13, 14, 15, 16].  
24  
25 The diagnosis of LNP is often based on clinical suspicion and the favorable response to  
26  
27 a lactose restricted diet.  
28  
29  
30

31  
32 The most widely used diagnostic test of poor lactose absorption is the hydrogen  
33  
34 breath test (HBT)[11, 17]. Nevertheless, this test has practical limits and its sensitivity  
35  
36 and specificity varies between 69 - 100% and 89 - 100%, respectively, compared to  
37  
38 measurement of LCT activity in intestinal biopsies. Additionally, there is a false  
39  
40 negative rate of 11 - 30%, and a false positive rate of up to 57% using this test[18, 19,  
41  
42 20]. Using SNP genotyping in patients with suspected LNP may therefore aid in proper  
43  
44 diagnosis[10, 21, 22, 23, 24, 25]. The only epidemiological study of adult hypolactasia  
45  
46 in a Chilean population was performed more than three decades ago[26] and suggested  
47  
48 that the prevalence of LNP was 56% and 75% for the pediatric and adult populations,  
49  
50 respectively. Our objectives were to determine the influence of the LCT C>T<sub>13910</sub> SNP  
51  
52 on the LP/LNP state in the Chilean population and to determine the population  
53  
54 prevalence of the SNP genotypes in a representative Hispanic and Amerindian  
55  
56  
57  
58  
59  
60

1  
2  
3 population with comparison of the genotypes to clinical symptoms related to dairies  
4  
5  
6 ingestion.  
7  
8  
9  
10  
11  
12  
13  
14  
15  
16  
17  
18  
19  
20  
21  
22  
23  
24  
25  
26  
27  
28  
29  
30  
31  
32  
33  
34  
35  
36  
37  
38  
39  
40  
41  
42  
43  
44  
45  
46  
47  
48  
49  
50  
51  
52  
53  
54  
55  
56  
57  
58  
59  
60

For peer review only



## **SUBJECTS AND METHODS**

### **Patients with clinical suspicion of lactase non persistence (LNP).**

In 2006, 51 patients were enrolled in a prospective study after being referred to the Gastroenterological Department of the Clinical Hospital at the Pontificia Universidad Catolica de Chile because of symptoms suggestive of LNP. A pre-coded survey was obtained from all patients to obtain demographic, anthropometric, familial, and clinical data, including any symptoms experienced during the diagnostic hydrogen breath test (HBT) such as abdominal pain, diarrhea, bloating, nausea, and vomiting. A 5 ml EDTA blood sample was obtained to extract DNA. Serum levels of immunoglobulin A and tissue anti-transglutaminase antibodies (hu tTG ELISA, IMMCO Diagnostics, Inc., Buffalo, NY) were quantified in all the patients to rule out the existence of celiac disease. This study was approved by the Ethics Committee of the Faculty of Medicine, PUC, and all patients signed a written informed consent form prior to the study.

### **Hydrogen breath test (HBT) for diagnosis of LNP.**

Patients were instructed to maintain a low fiber diet without lactose for 48 h prior to the day of the examination. After 12 h of fasting, a baseline concentration of H<sub>2</sub> in exhaled breath was determined using a Quintron® microLyzer (QuinTron Instrument Company, Milwaukee, WI). Subjects then ingested 25 g lactose and H<sub>2</sub> concentration in breath was quantified every 20 m for a maximum of 4 h. Individuals were considered LNP with an increase in H<sub>2</sub> concentration 20 ppm above the base value[17, 27].

### **Population study.**

A representative sample of 216 unrelated Hispanics and 43 unrelated Amerindians were randomly selected from an initial sample of 1581 Hispanics and 120 Amerindians (Mapuches, the Chilean native population) which were collected between 1993 and

1  
2  
3 2000 as described previously[28, 29]. By using an Amerindian Admixture Index based  
4  
5 on ABO blood group distribution, we have previously demonstrated in these cohorts a  
6  
7 40% and 80% Amerindian ancestry in the Hispanic and Mapuche population,  
8  
9 respectively. Furthermore, 88% of Hispanics and 100% of Mapuches shared ancestral  
10  
11 Amerindian mtDNA polymorphism[28, 29]. These results were in accordance with the  
12  
13 biparental founder origin of the mixed Chilean population, which could be similar to  
14  
15 other Hispanic populations from America[30, 31, 32].  
16  
17

18  
19 The sample size was selected by estimating an expected prevalence of the LCT-  
20  
21 13910CC genotype to be at least 50% in the Hispanic population and 80% in the  
22  
23 Amerindians, with an alpha error of 5% and a level of confidence of 80%. All study  
24  
25 subjects provided a DNA sample and a medical survey that provided anthropometric  
26  
27 and clinical data including information about diarrhea, abdominal pain, or bloating in  
28  
29 response to ingestion of dairy products[28, 29]. Furthermore, a subgroup of the  
30  
31 Hispanic subjects provided a semi-quantitative food frequency questionnaire with a 24 h  
32  
33 dietary recall. From this data, specific energy and nutrient ingestion from dairy products  
34  
35 was estimated using the Datadiet program[28, 33]. For all subjects, the occurrences of  
36  
37 digestive symptoms in response to consumption of lactose were correlated to SNP  
38  
39 genotyping results.  
40  
41  
42  
43  
44

#### 45 **Genotyping of LCT C>T<sub>-13910</sub> and LCT G>A<sub>-22018</sub> SNPs**

46  
47 SNP genotyping was performed using PCR-RFLP methods[34] (GenBank reference  
48  
49 sequence NM\_005915.4). Briefly, genomic DNA was extracted from 300 µl of blood  
50  
51 according to manufacturer's instructions (Wizard SV Genomic DNA Purification  
52  
53 System, Promega, Madison, WI) and the regions surrounding the SNPs were amplified  
54  
55 through PCR using primers (F) 5'-GGA TGC ACT GCT GTG ATG AG-3' and (R) 5-  
56  
57 CCC ACT GAC CTA TCC TCG TG-3' for the LCT C>T<sub>-13910</sub> and (F) 5'-AAC AGG  
58  
59  
60

1  
2  
3 CAC GTG GAG GAG TT-3' and (R) 5'- CCC ACC TCA GCC TCT TGA GT-3' for  
4  
5 LCT G>A <sub>-22018</sub> . In both cases, the amplified products were of 448 bp. The PCR  
6  
7 reactions and RFLP assays for the analysis of both genetic variants was carried out as  
8  
9 described previously [34]. Briefly, the amplified product for the LCT C>T <sub>-13910</sub> SNP  
10  
11 was digested with *BsmFI*, generating two fragments of 351 and 97 bp in the presence of  
12  
13 the CC genotype, and 3 fragments of 253, 98, and 97 bp in the presence of the TT  
14  
15 genotype (**Figure 1**). For the LCT G>A <sub>-22018</sub> SNP, the PCR product was digested with  
16  
17 *HhaI*, generating two fragments of 284 and 184 bp in the presence of the GG genotype  
18  
19 and one undigested fragment of 448 bp in the presence of the A/A genotype. The  
20  
21 amplified and digested PCR products were separated by electrophoresis on 2% agar gels  
22  
23 in 1X TAE buffer stained with ethidium bromide. Genotyping confirmation was carried  
24  
25 out on 35 samples by direct sequencing of the 448 bp amplified fragments (models  
26  
27 ABI-310 and ABI-3100 automated DNA sequencers, Applied Biosystems, Foster City,  
28  
29 CA) (**Figure 1**). There was complete concordance between the PCR-RFLP analysis and  
30  
31 the sequencing in all cases.  
32  
33  
34  
35  
36  
37  
38  
39

#### 40 **Statistical analysis**

41  
42 Mean and standard deviations were used to describe numeric variables. The variables of  
43  
44 categorical types are given as a number and a percentage. Comparisons of continuous  
45  
46 variables were performed using the student T test for independent samples.  
47  
48 Comparisons of categorical variables were carried out using the chi-square test. Using  
49  
50 the HBT breath test as diagnostic for LNP, an analysis was made of the sensitivity and  
51  
52 specificity of the genetic test as an alternative diagnostic test. Differences were  
53  
54 considered significant when  $p < 0.05$ .  
55  
56  
57  
58  
59  
60

## **RESULTS**

### **Hydrogen breath test and SNP genotyping**

Fifty-one patients with clinical suspicion of LNP (44 women and 7 men, age 14 - 79 y) were included in the study. Twenty-nine patients (56.8%) had a positive HBT and 22 were negative (43.2%) (**Table 1**). There were no significant differences in the distribution by sex and age between the two groups. There was a positive correlation between the HBT results and digestive symptoms reported during the test: 82% of the patients with positive HBT had symptoms associated with the lactose load, such as bloating, abdominal pain, and diarrhea (79%, 58% and 20%, respectively). In contrast, only 27% of the patients with negative HBT presented symptoms after ingesting lactose ( $p < 0.001$ ). Additionally, 76% of patients with positive HBT indicated a personal and/or family history of functional digestive disorders, compared to 36% of those with negative HBT ( $p < 0.001$ ).

The LCTC>T<sub>-13910</sub> SNP genotyping results for the 51 patients is shown in Table 1. Of the 29 patients with positive HBT, 26 (89.7%) had the LCT-13910CC genotype (the LNP genotype), and 3 (10.3%) had the LCT-13910CT genotype and were therefore phenotypically LNP but genotypically LP. However, two of these 3 patients experienced bloating and diarrhea during the HBT, which suggests malabsorption of lactose. Of the 22 patients who had a negative HBT, 19 were LCT-13910CT, two were LCT-13910TT, and a single 16-year-old patient had the LNP LCT-13910CC genotype (Table 1). However, this patient experienced abdominal pain during the HBT. Subsequent evaluation of this patient with a lactulose HBT (10 g load) revealed that this patient was not a non-producer of hydrogen. A single patient with LNP genotype and positive HBT had high levels of anti-tTG (27  $\mu$ U/ml), which suggests the possibility of

1  
2  
3 coexistence of LNP and celiac disease. All the patients showed normal levels of serum  
4  
5 IgA (data not shown).  
6

7  
8 There was complete genotypic correlation between the LCTC>T<sub>-13910</sub> and the LCTG>A.  
9  
10 <sub>22018</sub> SNPs, such that any subject homozygous or heterozygous for one SNP was at the  
11  
12 same time homozygous or heterozygous for the other SNP (data not shown).  
13  
14 Furthermore, there was good correlation between the LCTC>T<sub>-13910</sub> SNP findings and  
15  
16 the HBT test results (**Table 2**). Genotyping results were confirmed by sequencing for 35  
17  
18 of the 51 samples (**Figure 2**). Interestingly, one of the three discordant patients with  
19  
20 LNP phenotype but LP genotype was also heterozygous at a second location not  
21  
22 previously described in the literature, LCTG>A<sub>-13937</sub>.  
23  
24  
25  
26  
27

### 28 **Population study**

29  
30 We collected DNA samples and medical surveys from 216 unrelated Hispanic  
31  
32 individuals and 43 unrelated Amerindians. The survey information is summarized in  
33  
34 **Table 3**. The two groups were similar in age, with higher representation of females  
35  
36 among the Amerindians. The Amerindian cohort reported a higher frequency of  
37  
38 intolerance to ingesting dairy products and recurring diarrhea while both groups  
39  
40 reported recurring abdominal bloating with equal frequency.  
41  
42  
43

44  
45 The genotype and allele frequencies for the LCTC>T<sub>-13910</sub> SNP are shown in **Table 3**.  
46  
47 As was found in the study group of 51 Chilean patients with suspected lactose  
48  
49 intolerance, there was complete concordance between the genotypes of the LCTC>T.  
50  
51 <sub>13910</sub> and LCTG>A<sub>-22018</sub> SNPs in each individual (data not shown). The cohort of  
52  
53 Amerindian individuals was in Hardy-Weinberg equilibrium (**Figure 2**), but we  
54  
55 observed a slightly higher than expected frequency of the T<sub>-13910</sub> allele in the Hispanic  
56  
57 population (deviation from HW equilibrium  $p < 0.05$ ). ). Interestingly, this deviation  
58  
59 from HW equilibrium has also been observed in other mixed ethnicity groups[3, 35].  
60

1  
2  
3 The prevalence of the ancestral LCT-13910CC genotype (the LNP genotype) was  
4 56.9%, significantly lower than the prevalence of this genotype among the Amerindian  
5 individuals (88.3%). In turn, 41.7% of the Hispanics were LCT-13910CT genotype  
6 compared to only 11.7% of the Amerindians. The LCT-13910TT genotype was found in  
7 only 3 Hispanic subjects. Allele frequencies for the LCTC>T<sub>-13910</sub> SNP were  
8 significantly different between the two groups, with the T<sub>-13910</sub> allele being very  
9 infrequent in Amerindians.  
10

11  
12 For the 216 Hispanic individuals studied, we were able to gather clinical and genetic  
13 data (**Table 3**). Individuals with the LNP LCT-13910CC genotype were 3 times more  
14 likely to report intolerance to the ingestion of dairy products and recurring diarrhea than  
15 those with LP genotypes (LCT-13910CT or LCT-13910TT). For 112 of these  
16 individuals, we collected complete nutritional information. The consumption of dairy  
17 products was in general very low, equivalent to an average of 30 L of fresh milk per  
18 year per person. However, the group of individuals with an LP genotype had 38%  
19 higher consumption of dairy products than the group of individuals with the LNP  
20 genotype (38.4 L ± 67 L versus 27.7 L ± 40 L milk/year, respectively), although this  
21 difference was not statistically significant.  
22  
23  
24  
25  
26  
27  
28  
29  
30  
31  
32  
33  
34  
35  
36  
37  
38  
39  
40  
41  
42  
43  
44  
45  
46  
47  
48  
49  
50  
51  
52  
53  
54  
55  
56  
57  
58  
59  
60

## DISCUSSION

The normal physiologic decrease in lactase (LCT) production in the mammalian intestine following weaning is known as lactase non persistence (LNP), and results in the inability to digest the milk sugar, lactose, which can cause gastrointestinal symptoms after ingestion of dairies. The condition of lactase persistence (LP), found only in humans, allows the individual to continue to ingest and absorb lactose into adulthood. In European populations and some Afro-Arab pastoral groups, the LP condition has been shown to be due to SNP's found 13.9 kb upstream of the LCT gene and actually located within the 13<sup>th</sup> intron of the MCM6 gene. One of these SNP's, LCTC>T<sub>-13910</sub> (rs4988235), appeared approximately 10,000y ago in the human history and, has spread progressively from Northern Europe through the world due to population migration and mixing, increasing the state of LP in different populations[2]. The original populations of the Americas and Asia were likely LNP. There is no evidence of the existence of American variants that might have generated the LP state in the pre-Columbian era[2, 5]. The T<sub>-13910</sub> allele, which leads to the LP state, was likely introduced to the Americas by the migration of European carriers of this variant approximately 500 years ago and spread rapidly in the descending admixed Hispanic (Mestizo) populations of contemporary America, as is shown in this study as well as others[5, 36].

Our study of a representative population of Chile consisting of Hispanic and Amerindian individuals showed the prevalence of the LNP state (LCT-13910CC genotype) to be 57% and 88%, respectively. It is interesting to note that this observed genotypic frequency is very similar to the Amerindian admixture index (AAI) estimated by us in these same populations based on the distribution of ABO blood groups [28].

1  
2  
3 This suggests that the analysis of the LCTC>T<sub>-13910</sub> SNP in Latin American populations  
4 can be a good indicator of the degree of Amerindian or Caucasian inheritance.  
5  
6

7  
8 In all Chilean patients genotyped in this study, the LCTG>A<sub>-22018</sub> SNP genotype  
9 correlated completely with the genotype found for the LCTC>T<sub>-13910</sub> SNP, a finding  
10 reported in many studies. This phenomenon can be explained by the fact that both SNPs  
11 are located within a highly conserved block of linkage disequilibrium of at least 500 kb  
12 and likely co-segregate[2, 5].  
13  
14

15 According to HW equilibrium, in the group of 216 unrelated Hispanic individuals we  
16 observed a higher than expected frequency of the T<sub>-13910</sub> allele. While this could be  
17 explained by selection bias or by a higher frequency of LP in the Spanish population  
18 that founded the Chilean colony, it could also be reflective of positive selection for LP  
19 allele carriers, as has been suggested for decades[37, 38, 39]. Any evolutionary  
20 advantage conferred by the T<sub>-13910</sub> allele may or may not be related to the consumption  
21 of dairy products. Indeed, it was reported that this allele confers protection not only  
22 against bone fractures[40, 41], but also colon cancer[42].  
23  
24  
25  
26  
27  
28  
29  
30  
31  
32  
33  
34  
35  
36  
37

38 The validity of using LCTC>T<sub>-13910</sub> SNP genotyping for diagnosis of the LNP or LP  
39 state was evaluated in the group of 51 Chilean patients with suspected LNP. The HBT  
40 showed a high positive and negative predictive value, sensitivity and specificity  
41 compared to genetic testing (Table 2). These results are similar to those recently  
42 reported by other groups[10, 24, 34, 43] and confirm the utility of the analysis of this  
43 SNP as a clinical test for the diagnosis of LP/LNP in the adult Chilean population. Only  
44 3 patients (10.3%) with malabsorption of lactose shown by HBT, were genetically LP  
45 (LCT-13910CT genotype). It was not possible to recall these 3 patients to carry out  
46 complementary studies to rule out other causes of lactose malabsorption, such as  
47 intestinal parasitic infections like Giardiasis, seronegative celiac disease or other  
48  
49  
50  
51  
52  
53  
54  
55  
56  
57  
58  
59  
60



1  
2  
3 conditions as has been shown in other recent studies[43]. Interestingly, one of these  
4  
5 patients was also heterozygous at an additional SNP not previously described,  
6  
7 LCTG>A-13937[2]. We do not know if this new variant can explain the phenotype-  
8  
9 genotype discordance.  
10  
11

12  
13 A recent study showed a high prevalence of celiac illness among patients with an initial  
14  
15 diagnosis of LNP, suggesting that lactose intolerance can be the first manifestation of  
16  
17 celiac illness; the authors recommend considering the existence of celiac illness in all  
18  
19 patients with LNP before recommending a lactose free diet for life[44]. In our study of  
20  
21 51 patients with clinical suspicion of lactose intolerance, only one with LNP confirmed  
22  
23 by HBT and SNP genotyping had positive anti-tTG (2% of the total) suggesting the  
24  
25 coexistence of both conditions.  
26  
27

28  
29 One 16-year-old patient had negative HBT yet had the LNP genotype. It is possible that  
30  
31 this patient has not yet manifested the LNP phenotype and still maintains sufficient  
32  
33 levels of intestinal lactase to digest a 25 g load. The age at which the LNP state is  
34  
35 initiated varies among different populations and ethnic groups, starting as early as 1 to 8  
36  
37 y in black and Asian populations, and much later (20 y) in northern European  
38  
39 populations, and much later (20 y) in northern European  
40  
41 populations[10, 45, 46, 47]. The age of initiation of the LNP state in Chilean individuals  
42  
43 remains unknown.  
44

45  
46 Among the 51 Chilean patients with positive HBT and the LCT-13910CC genotype,  
47  
48 significantly more report having relatives with functional digestive disorders than their  
49  
50 HBT negative counterparts, suggesting that the condition of LNP could be in part  
51  
52 responsible for digestive symptoms. In our complete clinical, nutritional, and genetic  
53  
54 study of 112 Hispanic individuals, those with the LCT-13910CC genotype were  
55  
56 significantly more likely to self-report lactose intolerance despite very low (30 L  
57  
58 milk/person/year) consumption of dairy products. This level is well below the WHO  
59  
60

1  
2  
3 recommended level of 240 L milk/person/year. Reasons for the low level of  
4  
5 consumption are likely due to multiple causes including cost, preference, and societal  
6  
7 habits which are likely influenced by the existence of a high prevalence of LNP and  
8  
9 lactose intolerant state within this population. It has been reported that the allele  
10  
11 frequencies of the LCTC>T-13910 SNP within a population correlates with the tendency  
12  
13 of that population to consume dairy products and ingest calcium[48, 49, 50]. Both this  
14  
15 study and one other[51] show that the effective consumption of dairy products and  
16  
17 calcium in Chile remains below international recommendations.  
18  
19  
20  
21

22 In summary, the LNP state continues to be predominant in the Chilean population.  
23  
24 Epidemiologically, this may cause the development of digestive symptoms affecting  
25  
26 quality of life and leading to medical consultations as well as lower tendency to ingest  
27  
28 dairy products and calcium within the adult population of the contemporary Americas.  
29  
30 The fact that the LNP state is an inherited condition should be considered when  
31  
32 developing public programs that encourage consumption of dairy products, and should  
33  
34 be a stimulus for the food industry to develop new lactose-free dairy products.  
35  
36  
37  
38  
39  
40  
41  
42  
43  
44  
45  
46  
47  
48  
49  
50  
51  
52  
53  
54  
55  
56  
57  
58  
59  
60

**Table 1. Clinical and genetic characteristics of 51 Chilean patients having hydrogen breath test (HBT) for suspicion of lactose non persistence (LNP).**

|                                                               | <b>HBT Positive</b><br><b>(n = 29)</b> | <b>HBT Negative</b><br><b>(n = 22)</b> | <i>p</i> |
|---------------------------------------------------------------|----------------------------------------|----------------------------------------|----------|
| Female gender (%)                                             | 82.7                                   | 86.3                                   | n.s.     |
| Age (y)                                                       | 36 ± 19                                | 32 ± 12                                | n.s.     |
| Number reporting gastrointestinal symptoms after lactose load | 24 (82%)                               | 6 (27%)                                | < 0.001  |
| Number reporting family history of IBS                        | 22 (76%)                               | 8 (36%)                                | < 0.001  |
| LCT-13910 CC genotype                                         | 26 (89.6%)                             | 1 (4.5%)                               | < 0.001  |
| LCT-13910 CT/TT genotype                                      | 3 (10.3%)                              | 21(95.5%)                              | < 0.001  |

IBS, irritable bowel syndrome.

**Table 2. Correlation of the HBT in comparison to LCT C>T.<sub>13910</sub> genotype in 51 Chilean patients.**

|                           |       |
|---------------------------|-------|
| Sensitivity               | 96.3% |
| Specificity               | 87.5% |
| Predictive value positive | 89.7% |
| Predictive value negative | 95.5% |
| LHR positive              | 7.7   |
| LHR negative              | 0.04  |

LHR, likelihood ratio

**Table 3. General characteristics, self reported gastrointestinal symptoms related to dairy ingestion and LCTC>T<sub>-13910</sub> SNP genotype and allele frequencies in a population of Hispanic and Amerindian individuals.**

|                                           | <b>Hispanics</b><br>n = 216 | <b>Amerindians</b><br>n = 43 | <i>P</i> |
|-------------------------------------------|-----------------------------|------------------------------|----------|
| Women (%)                                 | 46                          | 65                           | 0.02     |
| Age (y)                                   | 50 ± 12                     | 54 ± 15                      | n.s.     |
| Number self reporting lactose intolerance | 44 (20.4%)                  | 19 (44.1%)                   | 0.001    |
| Number reporting diarrhea                 | 15 (7%)                     | 16 (37.2%)                   | <0.001   |
| Number reporting bloating                 | 77 (35.6%)                  | 14 (32.5%)                   | n.s.     |
| LCT-13910 CC genotype                     | 123 (56.9%)                 | 38 (88.3%)                   | < 0.001  |
| LCT-13910 CT genotype                     | 90 (41.7%)                  | 5 (11.7%)                    | < 0.001  |
| LCT-13910 TT genotype                     | 3 (1.4%)                    | 0                            | n.s.     |
| C allele frequency                        | 77.7%                       | 94.2%                        | < 0.001  |
| T allele frequency                        | 22.3%                       | 5.8%                         | < 0.001  |

n.s., not significant

1  
2  
3 **Author's contribution:** Study concept and design (JFM); acquisition of data (JFM,  
4 EM, LA, XM and CP); analysis and interpretation of data (JFM, EM, JCh); drafting of  
5 the manuscript (JFM, EM, XM, CP, LA); critical revision of the manuscript for  
6 important intellectual content (JCh); statistical analysis (JFM, EM, XM, CP); obtained  
7 funding (JFM, JCh); final revision and edition (JFM, CP, XM, EM, LA, JCh).  
8  
9

10  
11  
12  
13  
14  
15  
16 **Acknowledgments:** The authors acknowledge the Alexander von Humboldt  
17 Foundation (Germany) for donating the NanoDrop ND-1000 Spectrophotometer used  
18 for DNA analysis and quantification. The authors thank Dr. Flavio Nervi for providing  
19 access to the database and DNA bank of the Hispanic and Mapuche populations, and  
20 Dr. Julieta Klassen for collaboration in the analysis of dairy product ingestion.  
21  
22  
23  
24  
25  
26  
27  
28  
29

30  
31 **Funding:** This study was supported by grants of the National Commission of Scientific  
32 and Technological Research (FONDECYT N°1080325 to JFM), and of the Office of  
33 Research affairs of the Pontificia Universidad Catolica de Chile, School of Medicine to  
34 EM and JFM (PG-42/06).  
35  
36  
37  
38  
39  
40

41 **Competing Interest:** We declare no conflicts of interest.  
42  
43  
44

#### 45 **License for Publication:**

46  
47  
48 The Corresponding Author has the right to grant on behalf of all authors and does grant  
49 on behalf of all authors, an exclusive license (or non exclusive for government  
50 employees) on a worldwide basis to the BMJ Publishing Group Ltd and its Licensees to  
51 permit this article (if accepted) to be published in BMJ Open editions and any other  
52 BMJ PGL products to exploit all subsidiary rights, as set out in our license.  
53  
54  
55  
56  
57  
58  
59  
60

## REFERENCES

- 1 Enattah N, Pekkarinen T, Valimaki MJ, *et al.* Genetically defined adult-type hypolactasia and self-reported lactose intolerance as risk factors of osteoporosis in Finnish postmenopausal women. *Eur J Clin Nutr* 2005;**59**:1105-11.
- 2 Ingram CJ, Mulcare CA, Itan Y, *et al.* Lactose digestion and the evolutionary genetics of lactase persistence. *Hum Genet* 2009;**124**:579-91.
- 3 Lomer MC, Parkes GC, Sanderson JD. Review article: lactose intolerance in clinical practice--myths and realities. *Aliment Pharmacol Ther* 2008;**27**:93-103.
- 4 Matthews SB, Waud JP, Roberts AG, *et al.* Systemic lactose intolerance: a new perspective on an old problem. *Postgrad Med J* 2005;**81**:167-73.
- 5 Bersaglieri T, Sabeti PC, Patterson N, *et al.* Genetic signatures of strong recent positive selection at the lactase gene. *Am J Hum Genet* 2004;**74**:1111-20.
- 6 Enattah NS, Sahi T, Savilahti E, *et al.* Identification of a variant associated with adult-type hypolactasia. *Nat Genet* 2002;**30**:233-7.
- 7 Tishkoff SA, Reed FA, Ranciaro A, *et al.* Convergent adaptation of human lactase persistence in Africa and Europe. *Nat Genet* 2007;**39**:31-40.
- 8 Kuokkanen M, Enattah NS, Oksanen A, *et al.* Transcriptional regulation of the lactase-phlorizin hydrolase gene by polymorphisms associated with adult-type hypolactasia. *Gut* 2003;**52**:647-52.
- 9 Lewinsky RH, Jensen TG, Moller J, *et al.* T-13910 DNA variant associated with lactase persistence interacts with Oct-1 and stimulates lactase promoter activity in vitro. *Hum Mol Genet* 2005;**14**:3945-53.
- 10 Rasinpera H, Savilahti E, Enattah NS, *et al.* A genetic test which can be used to diagnose adult-type hypolactasia in children. *Gut* 2004;**53**:1571-6.

- 1  
2  
3 11 Shaw AD, Davies GJ. Lactose intolerance: problems in diagnosis and treatment.  
4  
5 J Clin Gastroenterol 1999;**28**:208-16.  
6  
7  
8 12 Parker TJ, Woolner JT, Prevost AT, *et al.* Irritable bowel syndrome: is the  
9  
10 search for lactose intolerance justified? Eur J Gastroenterol Hepatol 2001;**13**:219-25.  
11  
12  
13 13 Vesa TH, Seppo LM, Marteau PR, *et al.* Role of irritable bowel syndrome in  
14  
15 subjective lactose intolerance. Am J Clin Nutr 1998;**67**:710-5.  
16  
17  
18 14 Bode S, Gudmand-Hoyer E. Incidence and clinical significance of lactose  
19  
20 malabsorption in adult coeliac disease. Scand J Gastroenterol 1988;**23**:484-8.  
21  
22  
23 15 Srinivasan U, Jones E, Weir DG, *et al.* Lactase enzyme, detected  
24  
25 immunohistochemically, is lost in active celiac disease, but unaffected by oats  
26  
27 challenge. Am J Gastroenterol 1999;**94**:2936-41.  
28  
29  
30 16 Barr RG, Levine MD, Watkins JB. Recurrent abdominal pain of childhood due  
31  
32 to lactose intolerance. N Engl J Med 1979;**300**:1449-52.  
33  
34  
35 17 Peuhkuri K, Poussa T, Korpela R. Comparison of a portable breath hydrogen  
36  
37 analyser (Micro H2) with a Quintron MicroLyzer in measuring lactose maldigestion,  
38  
39 and the evaluation of a Micro H2 for diagnosing hypolactasia. Scand J Clin Lab Invest  
40  
41 1998;**58**:217-24.  
42  
43  
44 18 Rosado JL, Solomons NW. Sensitivity and specificity of the hydrogen breath-  
45  
46 analysis test for detecting malabsorption of physiological doses of lactose. Clin Chem  
47  
48 1983;**29**:545-8.  
49  
50  
51 19 Barillas-Mury C, Solomons NW. Test-retest reproducibility of hydrogen breath  
52  
53 test for lactose maldigestion in preschool children. J Pediatr Gastroenterol Nutr  
54  
55 1987;**6**:281-5.  
56  
57  
58 20 Arola H, Koivula T, Jokela H, *et al.* Comparison of indirect diagnostic methods  
59  
60 for hypolactasia. Scand J Gastroenterol 1988;**23**:351-7.



- 1  
2  
3 21 Jarvela IE. Molecular diagnosis of adult-type hypolactasia (lactase non-  
4 persistence). *Scand J Clin Lab Invest* 2005;**65**:535-9.  
5  
6  
7  
8 22 Bodlaj G, Stocher M, Hufnagl P, *et al.* Genotyping of the lactase-phlorizin  
9 hydrolase -13910 polymorphism by LightCycler PCR and implications for the diagnosis  
10 of lactose intolerance. *Clin Chem* 2006;**52**:148-51.  
11  
12  
13  
14  
15 23 Enattah NS, Kuokkanen M, Forsblom C, *et al.* Correlation of intestinal  
16 disaccharidase activities with the C/T-13910 variant and age. *World J Gastroenterol*  
17 2007;**13**:3508-12.  
18  
19  
20  
21  
22 24 Schirru E, Corona V, Usai-Satta P, *et al.* Genetic testing improves the diagnosis  
23 of adult type hypolactasia in the Mediterranean population of Sardinia. *Eur J Clin Nutr*  
24 2007;**61**:1220-5.  
25  
26  
27  
28  
29 25 Satta PU, Congia M, Schirru E, Scarpa M, Mura G. Genetic testing is ready to  
30 change the diagnostic scenario of lactose malabsorption. *Gut* 2008;**57**:137-8; author  
31 reply 8.  
32  
33  
34  
35  
36 26 Lacassie Y, Weinberg R, Monckeberg F. Poor predictability of lactose  
37 malabsorption from clinical symptoms for Chilean populations. *Am J Clin Nutr*  
38 1978;**31**:799-804.  
39  
40  
41  
42  
43 27 Rana S, Bhasin DK, Gupta D, *et al.* Assessment of optimal dose of lactose for  
44 lactose hydrogen breath test in Indian adults. *Indian J Gastroenterol* 1995;**14**:13-4.  
45  
46  
47  
48 28 Miquel JF, Covarrubias C, Villaroel L, *et al.* Genetic epidemiology of  
49 cholesterol cholelithiasis among Chilean Hispanics, Amerindians, and Maoris.  
50 *Gastroenterology* 1998;**115**:937-46.  
51  
52  
53  
54  
55 29 Nervi F, Miquel JF, Alvarez M, *et al.* Gallbladder disease is associated with  
56 insulin resistance in a high risk Hispanic population. *J Hepatol* 2006;**45**:299-305.  
57  
58  
59  
60

- 1  
2  
3 30 Merriwether DA, Rothhammer F, Ferrell RE. Distribution of the four founding  
4 lineage haplotypes in Native Americans suggests a single wave of migration for the  
5 New World. *Am J Phys Anthropol* 1995;**98**:411-30.  
6  
7  
8  
9  
10 31 Moraga ML, Rocco P, Miquel JF, *et al.* Mitochondrial DNA polymorphisms in  
11 Chilean aboriginal populations: implications for the peopling of the southern cone of the  
12 continent. *Am J Phys Anthropol* 2000;**113**:19-29.  
13  
14  
15  
16  
17 32 Rocco P, Morales C, Moraga M, *et al.* [Genetic composition of the Chilean  
18 population. Analysis of mitochondrial DNA polymorphism]. *Rev Med Chil*  
19 2002;**130**:125-31.  
20  
21  
22  
23  
24 33 Cuevas A, Miquel JF, Reyes MS, *et al.* Diet as a risk factor for cholesterol  
25 gallstone disease. *J Am Coll Nutr* 2004;**23**:187-96.  
26  
27  
28  
29 34 Buning C, Genschel J, Jurga J, *et al.* Introducing genetic testing for adult-type  
30 hypolactasia. *Digestion* 2005;**71**:245-50.  
31  
32  
33  
34 35 Almon R, Engfeldt P, Tysk C, *et al.* Prevalence and trends in adult-type  
35 hypolactasia in different age cohorts in Central Sweden diagnosed by genotyping for the  
36 adult-type hypolactasia-linked LCT -13910C > T mutation. *Scand J Gastroenterol*  
37 2007;**42**:165-70.  
38  
39  
40  
41  
42 43 Bulhoes AC, Goldani HA, Oliveira FS, *et al.* Correlation between lactose  
44 absorption and the C/T-13910 and G/A-22018 mutations of the lactase-phlorizin  
45 hydrolase (LCT) gene in adult-type hypolactasia. *Braz J Med Biol Res* 2007;**40**:1441-6.  
46  
47  
48  
49  
50 51 Cook GC, al-Torki MT. High intestinal lactase concentrations in adult Arbs in  
52 Saudi Arabia. *Br Med J* 1975;**3**:135-6.  
53  
54  
55 56 38 Charney M, McCracken RD. Intestinal lactase deficiency in adult nonhuman  
57 primates: implications for selection pressures in man. *Soc Biol* 1971;**18**:416-21.  
58  
59  
60

- 1  
2  
3 39 Simoons FJ. Primary adult lactose intolerance and the milking habit: a problem  
4  
5 in biologic and cultural interrelations. II. A culture historical hypothesis. *Am J Dig Dis*  
6  
7 1970;**15**:695-710.  
8  
9  
10 40 Enattah NS, Sulkava R, Halonen P, *et al.* Genetic variant of lactase-persistent  
11  
12 C/T-13910 is associated with bone fractures in very old age. *J Am Geriatr Soc*  
13  
14 2005;**53**:79-82.  
15  
16  
17 41 Obermayer-Pietsch BM, Gugatschka M, Reitter S, *et al.* Adult-type hypolactasia  
18  
19 and calcium availability: decreased calcium intake or impaired calcium absorption?  
20  
21 *Osteoporos Int* 2007;**18**:445-51.  
22  
23  
24 42 Rasinpera H, Forsblom C, Enattah NS, *et al.* The C/C-13910 genotype of adult-  
25  
26 type hypolactasia is associated with an increased risk of colorectal cancer in the Finnish  
27  
28 population. *Gut* 2005;**54**:643-7.  
29  
30  
31 43 Krawczyk M, Wolska M, Schwartz S, *et al.* Concordance of genetic and breath  
32  
33 tests for lactose intolerance in a tertiary referral centre. *J Gastrointest Liver Dis*  
34  
35 2008;**17**:135-9.  
36  
37  
38 44 Ojetti V, Nucera G, Migneco A, *et al.* High prevalence of celiac disease in  
39  
40 patients with lactose intolerance. *Digestion* 2005;**71**:106-10.  
41  
42  
43 45 Sahi T, Isokoski M, Jussila J, *et al.* Lactose malabsorption in Finnish children of  
44  
45 school age. *Acta Paediatr Scand* 1972;**61**:11-6.  
46  
47  
48 46 Simoons FJ. Age of onset of lactose malabsorption. *Pediatrics* 1980;**66**:646-8.  
49  
50  
51 47 Wang Y, Harvey CB, Hollox EJ, *et al.* The genetically programmed down-  
52  
53 regulation of lactase in children. *Gastroenterology* 1998;**114**:1230-6.  
54  
55  
56 48 Laaksonen MM, Mikkila V, Rasanen L, *et al.* Genetic lactase non-persistence,  
57  
58 consumption of milk products and intakes of milk nutrients in Finns from childhood to  
59  
60 young adulthood. *Br J Nutr* 2009:1-10.

1  
2  
3 49 Torniaainen S, Hedelin M, Autio V, *et al.* Lactase persistence, dietary intake of  
4 milk, and the risk for prostate cancer in Sweden and Finland. *Cancer Epidemiol*  
5 *Biomarkers Prev* 2007;**16**:956-61.  
6  
7

8  
9  
10 50 Lehtimaki T, Hemminki J, Rontu R, *et al.* The effects of adult-type hypolactasia  
11 on body height growth and dietary calcium intake from childhood into young  
12 adulthood: a 21-year follow-up study--the Cardiovascular Risk in Young Finns Study.  
13 *Pediatrics* 2006;**118**:1553-9.  
14  
15

16  
17 51 Castillo C, Atalah E, Benavides X, Urteaga C. [Food patterns among adults  
18 visiting primary care clinics in the metropolitan region]. *Rev Med Chil* 1997;**125**:283-9.  
19  
20  
21  
22  
23  
24  
25  
26  
27  
28  
29  
30  
31  
32  
33  
34  
35  
36  
37  
38  
39  
40  
41  
42  
43  
44  
45  
46  
47  
48  
49  
50  
51  
52  
53  
54  
55  
56  
57  
58  
59  
60

## FIGURE LEGENDS

**Figure 1.** RFLP and sequence analysis of a 448 bp region of MCM6 intron 13 containing the LCTC>T<sub>-13910</sub> SNP. Upper panel: RFLP analysis of the 448 bp amplicon digested with BsmFI. Left lane, 50-bp DNA ladder. Right lane, undigested PCR amplicon. Center lanes, digested products from representative individuals having the three different SNP genotypes. The ancestral LCT-13910CC genotype results in two bands of 350 bp and 110 bp; LCT-13910CT genotype results in three bands of 350 bp, 240 bp and 110 bp; LCT-13910TT genotype results in two bands of 240 bp and 110 bp. Lower panel: Representative sequence tracings showing confirmation of RFLP data. Direct sequence analysis was performed on 35 of the 51 samples.

**Figure 2.** De Finetti diagram for the LCTC>T<sub>-13910</sub> SNP in Hispanic (black dotted line) and Amerindian (blue dotted line) populations. The diagram shows genotype and allele frequencies. The frequencies of homozygous genotypes are plotted on the left and right diagonal axes, the frequencies of heterozygous genotypes are plotted on the vertical axis, and the allele frequencies are depicted by the interaction of the vertical dotted lines with the bottom perpendicular (allele 1 = C<sub>-13910</sub>). The genotype frequencies plot on the parabola in the diagram, indicating that Amerindians are, but Hispanics are not, in Hardy-Weinberg equilibrium (Hardy-Weinberg parabola). The diagram was plotted using the software package developed by T.M. Strom and T.F. Wienker (<http://ihg.gsf.de/cgi-bin/hw/hwal.pl>).

STROBE Statement—Checklist of items that should be included in reports of *case-control studies*

| Section/Topic            | Item # | Recommendation                                                                                                                                                                       | Reported on page # |
|--------------------------|--------|--------------------------------------------------------------------------------------------------------------------------------------------------------------------------------------|--------------------|
| Title and abstract       | 1      | (a) Indicate the study's design with a commonly used term in the title or the abstract                                                                                               | 2                  |
|                          |        | (b) Provide in the abstract an informative and balanced summary of what was done and what was found                                                                                  | 2                  |
| <b>Introduction</b>      |        |                                                                                                                                                                                      |                    |
| Background/rationale     | 2      | Explain the scientific background and rationale for the investigation being reported                                                                                                 | 6                  |
| Objectives               | 3      | State specific objectives, including any prespecified hypotheses                                                                                                                     | 7                  |
| <b>Methods</b>           |        |                                                                                                                                                                                      |                    |
| Study design             | 4      | Present key elements of study design early in the paper                                                                                                                              | 9                  |
| Setting                  | 5      | Describe the setting, locations, and relevant dates, including periods of recruitment, exposure, follow-up, and data collection                                                      | 9                  |
| Participants             | 6      | (a) Give the eligibility criteria, and the sources and methods of case ascertainment and control selection. Give the rationale for the choice of cases and controls                  | 9-10               |
|                          |        | (b) For matched studies, give matching criteria and the number of controls per case                                                                                                  |                    |
| Variables                | 7      | Clearly define all outcomes, exposures, predictors, potential confounders, and effect modifiers. Give diagnostic criteria, if applicable                                             | 9-10               |
| Data sources/measurement | 8*     | For each variable of interest, give sources of data and details of methods of assessment (measurement). Describe comparability of assessment methods if there is more than one group | 9-10               |
| Bias                     | 9      | Describe any efforts to address potential sources of bias                                                                                                                            | 4                  |
| Study size               | 10     | Explain how the study size was arrived at                                                                                                                                            | 9                  |
| Quantitative variables   | 11     | Explain how quantitative variables were handled in the analyses. If applicable, describe which groupings were chosen and why                                                         | 10                 |

|                     |     |                                                                                                                                                                                                              |       |
|---------------------|-----|--------------------------------------------------------------------------------------------------------------------------------------------------------------------------------------------------------------|-------|
| Statistical methods | 12  | (a) Describe all statistical methods, including those used to control for confounding                                                                                                                        | 10    |
|                     |     | (b) Describe any methods used to examine subgroups and interactions                                                                                                                                          | n.a.  |
|                     |     | (c) Explain how missing data were addressed                                                                                                                                                                  | n.a.  |
|                     |     | (d) If applicable, explain how matching of cases and controls was addressed                                                                                                                                  | n.a.  |
|                     |     | (e) Describe any sensitivity analyses                                                                                                                                                                        | n.a.  |
| <b>Results</b>      |     |                                                                                                                                                                                                              |       |
| Participants        | 13* | (a) Report numbers of individuals at each stage of study—eg numbers potentially eligible, examined for eligibility, confirmed eligible, included in the study, completing follow-up, and analyzed            | n.a.  |
|                     |     | (b) Give reasons for non-participation at each stage                                                                                                                                                         | n.a.  |
|                     |     | (c) Consider use of a flow diagram                                                                                                                                                                           | n.a.  |
| Descriptive data    | 14* | (a) Give characteristics of study participants (eg demographic, clinical, social) and information on exposures and potential confounders                                                                     | 12,26 |
|                     |     | (b) Indicate number of participants with missing data for each variable of interest                                                                                                                          | n.a.  |
| Outcome data        | 15* | Report numbers in each exposure category, or summary measures of exposure                                                                                                                                    | 13,28 |
| Main results        | 16  | (a) Give unadjusted estimates and, if applicable, confounder-adjusted estimates and their precision (eg, 95% confidence interval). Make clear which confounders were adjusted for and why they were included | n.a.  |
|                     |     | (b) Report category boundaries when continuous variables were categorized                                                                                                                                    | n.a.  |
|                     |     | (c) If relevant, consider translating estimates of relative risk into absolute risk for a meaningful time period                                                                                             | n.a.  |
| Other analyses      | 17  | Report other analyses done—eg analyses of subgroups and interactions, and sensitivity analyses                                                                                                               | n.a.  |
| <b>Discussion</b>   |     |                                                                                                                                                                                                              |       |
| Key results         | 18  | Summarize key results with reference to study objectives                                                                                                                                                     | 16,17 |
| Limitations         | 19  | Discuss limitations of the study, taking into account sources of                                                                                                                                             | 16    |

|                          |    |                                                                                                                                                                            |       |
|--------------------------|----|----------------------------------------------------------------------------------------------------------------------------------------------------------------------------|-------|
|                          |    | potential bias or imprecision.<br><br>Discuss both direction and magnitude of any potential bias                                                                           |       |
| Interpretation           | 20 | Give a cautious overall interpretation of results considering objectives, limitations, multiplicity of analyses, results from similar studies, and other relevant evidence | 17,18 |
| Generalisability         | 21 | Discuss the generalisability (external validity) of the study results                                                                                                      | 18    |
| <b>Other information</b> |    |                                                                                                                                                                            |       |
| Funding                  | 22 | Give the source of funding and the role of the funders for the present study and, if applicable, for the original study on which the present article is based              | 18    |

\*Give information separately for cases and controls in case-control studies and, if applicable, for exposed and unexposed groups in cohort and cross-sectional studies.

**Note:** An Explanation and Elaboration article discusses each checklist item and gives methodological background and published examples of transparent reporting. The STROBE checklist is best used in conjunction with this article (freely available on the Web sites of PLoS Medicine at <http://www.plosmedicine.org/>, Annals of Internal Medicine at <http://www.annals.org/>, and Epidemiology at <http://www.epidem.com/>). Information on the STROBE Initiative is available at [www.strobe-statement.org](http://www.strobe-statement.org).



Figure 1

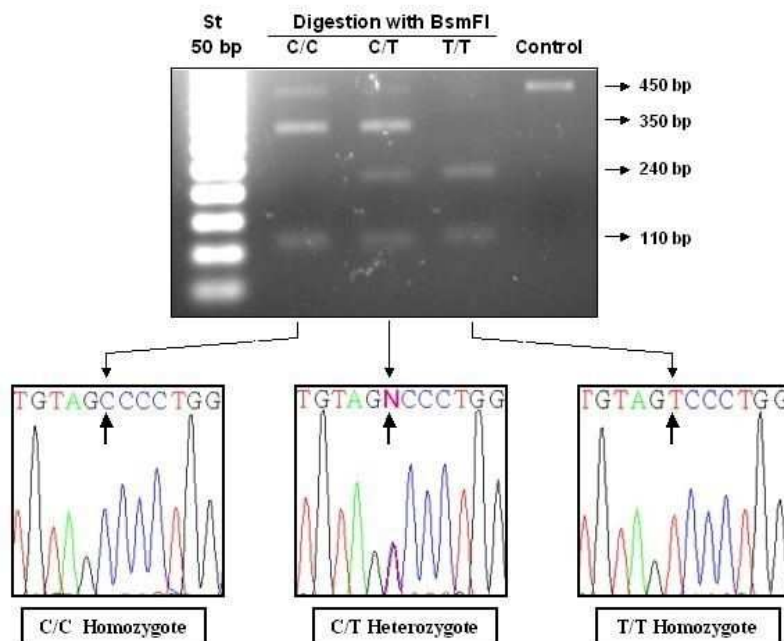

Figure 1. RFLP and sequence analysis of a 448 bp region of MCM6 intron 13 containing the LCTC>T-13910 SNP. Upper panel: RFLP analysis of the 448 bp amplicon digested with BsmFI. Left lane, 50-bp DNA ladder. Right lane, undigested PCR amplicon. Center lanes, digested products from representative individuals having the three different SNP genotypes. The ancestral LCT-13910CC genotype results in two bands of 350 bp and 110 bp; LCT-13910CT genotype results in three bands of 350 bp, 240 bp and 110 bp; LCT-13910TT genotype results in two bands of 240 bp and 110 bp. Lower panel: Representative sequence tracings showing confirmation of RFLP data. Direct sequence analysis was performed on 35 of the 51 samples.

60x45mm (300 x 300 DPI)

Figure 2

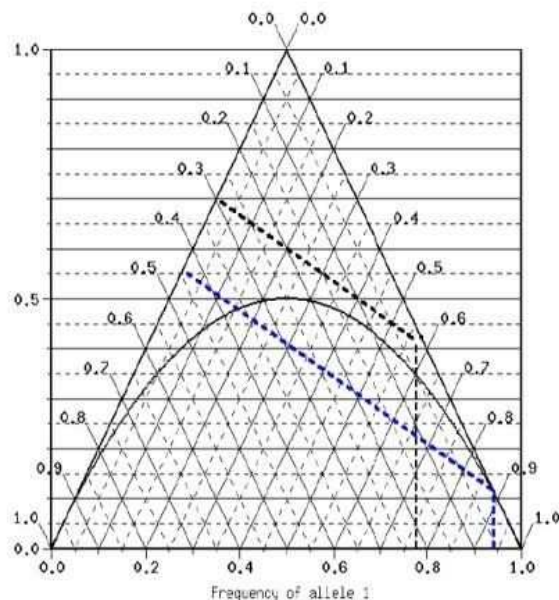

Figure 2. De Finetti diagram for the LCTC>T-13910 SNP in Hispanic (black dotted line) and Amerindian (blue dotted line) populations. The diagram shows genotype and allele frequencies. The frequencies of homozygous genotypes are plotted on the left and right diagonal axes, the frequencies of heterozygous genotypes are plotted on the vertical axis, and the allele frequencies are depicted by the interaction of the vertical dotted lines with the bottom perpendicular (allele 1 = C-13910). The genotype frequencies plot on the parabola in the diagram, indicating that Amerindians are, but Hispanics are not, in Hardy-Weinberg equilibrium (Hardy-Weinberg parabola). The diagram was plotted using the software package developed by T.M. Strom and T.F. Wienker (<http://ihg.gsf.de/cgi-bin/hw/hwal.pl>).  
60x45mm (300 x 300 DPI)

only
